1  
2  
3  
4  
5  
6  
7  
8  
9  
10  
11  
12  
13  
14  
15  
16  
17  
18  
19  
20  
21  
22  
23  
24  
25  
26  
27  
28  
29  
30  
31  
32

## The Endocytic Recycling Compartment Serves as a Viral Factory for Hepatitis E Virus

Cyrine Bentaleb<sup>a#</sup>, Kévin Hervouet<sup>a#</sup>, Claire Montpellier<sup>a</sup>, Charline Camuzet<sup>a</sup>, Julien Burlaud-Gaillard<sup>b,c</sup>, Martin Ferrié<sup>a</sup>, Elisabeth Werkmeister<sup>d</sup>, Karoline Metzger<sup>a</sup>, Nancy Leon Janampa<sup>b</sup>, Julien Marlet<sup>b</sup>, Julien Roux<sup>e</sup>, Clarence Deffaud<sup>e</sup>, Anne Goffard<sup>a</sup>, Yves Rouillé<sup>a</sup>, Jean Dubuisson<sup>a</sup>, Philippe Roingeard<sup>b,c</sup>, Cécile-Marie Aliouat-Denis<sup>a,\$</sup> and Laurence Cocquerel<sup>a,\$,\*</sup>

<sup>a</sup> University of Lille, CNRS, INSERM, CHU Lille, Pasteur Institute of Lille, U1019-UMR 9017-CIIL- Center for Infection and Immunity of Lille, F-59000 Lille, France.

<sup>b</sup> Inserm U1259. Morphogénèse et Antigénicité du VIH et des Virus des Hépatites (MAVIVH), Université de Tours and CHRU de Tours, 37032 Tours, France.

<sup>c</sup> Université de Tours et CHRU de Tours, Plateforme IBiSA de Microscopie Electronique, Tours, France

<sup>d</sup> Univ. Lille, CNRS, Inserm, CHU Lille, Institut Pasteur de Lille, UMR2014 - US41 - PLBS-Plateformes Lilloises de Biologie & Santé, Lille, France.

<sup>e</sup> BIOTEM, Apprieu, France

<sup>#</sup>C.B. and K.H. contributed equally to this work

<sup>\$</sup>C-M.A-D. and L.C. contributed equally to this work

\*Corresponding author: Laurence Cocquerel, University of Lille, CNRS, INSERM, CHU Lille, Pasteur Institute of Lille, U1019-UMR 9017-CIIL- Center for Infection and Immunity of Lille, F-59000 Lille, France, [laurence.cocquerel@cnrs.fr](mailto:laurence.cocquerel@cnrs.fr)

**Keywords:** Hepatitis E virus, ORF2 capsid protein, antibodies, infectious particles, viral factories, electron microscopy, endocytic recycling compartment

**Word count:** Abstract (275), Introduction (519), Mat & Met (826), Results (2620), Discussion (1455) and Fig legends (986)

**Number of figures:** 8

1 **Conflict of interest:** CM, JD and LC are coinventors of two patent applications on the  
2 use of antibodies having specificity for the ORF2i protein for HEV diagnostic purposes.  
3 Patents have been filed by Inserm-Transfert. JR and CD are employees of the BIOTEM  
4 company. The authors have no other potential conflict of interest.

5 **Financial support:** This work has been funded by Inserm-Transfert (MAT-PI-17006),  
6 Pasteur Institute of Lille (DiagHepE), Region Hauts-de-France (DiagHepE), ANRS and  
7 the University of Tours.

8 **Authors contributions:** C.B., K.H., C.M., C.C., J.B-G., M.F., K.M., J.R., Y.R., J.D.,  
9 P.R., C-M.A., and L.C. performed research and/or analyzed data.

10 E.W., N.L.J., J.M., C.D., A.G., contributed to reagents or analytic tool.

11 L.C. wrote the paper.

12

13

1 **Abstract**

2 **Background & Aims:** Although Hepatitis E virus (HEV) is the major leading cause of  
3 enterically transmitted viral hepatitis worldwide, many gaps remain in the  
4 understanding of the HEV lifecycle. Notably, viral factories induced by HEV have not  
5 been documented yet and it is currently unknown whether HEV infection leads to  
6 cellular membrane modelling as many positive-strand RNA viruses. HEV genome  
7 encodes three proteins, the ORF1 replicase, the ORF2 capsid protein and the ORF3  
8 protein involved in virion egress. Previously, we demonstrated that HEV produces  
9 different ORF2 isoforms including the virion-associated ORF2i form. Here, we aimed  
10 to probe infectious particles and viral factories in HEV-producing cells, using antibodies  
11 directed against the different ORF2 isoforms.

12 **Methods:** We generated monoclonal antibodies that specifically recognize the  
13 particle-associated ORF2i form, and antibodies that recognize the different ORF2  
14 isoforms. We used them in confocal and electron microscopy approaches to probe  
15 viral factories in HEV-producing cells. We performed an extensive colocalization study  
16 of viral proteins with subcellular markers. We analyzed the impact of silencing Rab11,  
17 a central player of the endocytic recycling compartment (ERC).

18 **Results:** One of the antibodies, named P1H1 and targeting the N-terminus of ORF2i,  
19 recognized delipidated HEV particles. Confocal and ultrastructural microscopy  
20 analyses of HEV-producing cells revealed an unprecedented HEV-induced membrane  
21 network containing tubular and vesicular structures. These subcellular structures were  
22 enriched in ORF2 and ORF3 proteins, and were dependent on the ORF3 expression  
23 and ORF2i capsid protein assembly. Colocalization and silencing analyses revealed  
24 that these structures are derived from the ERC.

1 **Conclusions:** Our study reveals that HEV hijacks the ERC and forms a membrane  
2 network of vesicular and tubular structures that might be the hallmark of HEV infection.

3

4

5 **Lay summary**

6 Hepatitis E virus (HEV) is the leading cause of acute hepatitis worldwide but many  
7 steps of its lifecycle are still elusive. Thanks to the development of new antibodies that  
8 recognize the different forms of the HEV capsid protein, we were able to visualize  
9 vesicular and tubular structures that were established by the virus in the host cell. In  
10 addition, extensive efforts to identify these structures led us to conclude that HEV  
11 hijacks the endocytic recycling compartment of the cell to form this network of vesicles  
12 and tubules, which might be the hallmark of HEV infection.

## 1 **Introduction**

2 Hepatitis E virus (HEV) is the most common cause of acute viral hepatitis worldwide.  
3 Four main distinct genotypes (gt), belonging to a single serotype, infect humans. HEV  
4 gt1 and gt2 are restricted to humans and are responsible for waterborne outbreaks in  
5 developing countries with low sanitary conditions. HEV gt3 and gt4 are zoonotic and  
6 cause sporadic zoonotic foodborne hepatitis in industrialized countries [1–3]. Although  
7 HEV causes a mostly asymptomatic self-limited disease, gt1-infection can lead to  
8 fulminant liver failure, particularly in pregnant women, and gt3-infection can lead to  
9 chronic disease in immunosuppressed patients. There is no specific treatment nor  
10 universal vaccine against HEV [4].

11 HEV is found as a non-enveloped virus in bile and feces or as a quasi-enveloped virus  
12 (eHEV) in blood and cell culture. Its RNA genome encodes three proteins, the ORF1  
13 replicase, the ORF2 capsid protein and the ORF3 protein involved in virion egress [5].  
14 Previously, we demonstrated that, during the HEV lifecycle, HEV produces at least 3  
15 forms of the ORF2 capsid protein: infectious ORF2 (ORF2i), glycosylated ORF2  
16 (ORF2g), and cleaved ORF2 (ORF2c) [6]. The ORF2i protein is the structural  
17 component of infectious particles that is likely derived from the assembly of the  
18 intracellular ORF2 (ORF2intra) form. In contrast, ORF2g and ORF2c proteins (herein  
19 referred to as ORF2g/c) are not associated with infectious material but secreted in  
20 large amounts (*i.e.*, about 1000x more than ORF2i [7]) and are the most abundant  
21 antigens detected in patient sera [6]. In addition, these proteins likely act as humoral  
22 decoys that inhibit antibody-mediated neutralization [7]. Recently, we demonstrated  
23 that a 5 amino acid Arginine-Rich Motif (ARM) located in the ORF2 N-terminal region  
24 is a unique central regulator of ORF2 addressing that finely controls the HEV lifecycle  
25 [8]. Indeed, the ARM controls ORF2 nuclear translocation, promoting regulation of host

1 antiviral responses. This motif also regulates the dual topology and functionality of  
2 ORF2 signal peptide, leading to the production of either cytosolic infectious ORF2i or  
3 reticular non-infectious glycosylated ORF2 forms. Furthermore, the ARM likely serves  
4 as a cleavage site of the glycosylated ORF2 protein. Finally, it promotes ORF2  
5 membrane association that is likely essential for particle assembly [8].

6 Recent breakthroughs have been achieved in developing cell culture models for HEV  
7 [9]. However, many gaps remain in the knowledge of the HEV lifecycle such as the  
8 intracellular location of HEV replication and particle assembly as well as the underlying  
9 mechanisms of these processes [10]. It is known that the majority of positive sense  
10 single-stranded RNA viruses induce host cell membrane rearrangements to facilitate  
11 their viral genome replication, viral particle assembly and to protect from the innate  
12 immune response. These membrane rearrangements have been well-characterized  
13 by confocal and electron microscopy approaches leading to the identification of a broad  
14 spectrum of complexity between the host membrane remodeling and viral and cellular  
15 actors involved in these arrangements [11]. However, due to a scarcity of robust cell  
16 culture models, membrane remodeling and viral factories induced by HEV have not  
17 been documented yet. Here, we generated monoclonal antibodies directed against the  
18 ORF2 capsid protein and used them to probe infectious particles and viral factories in  
19 HEV-producing cells.

## 1 **Materials and methods**

2

3 **Antibodies.** Mice immunization and generation of P1H1, P2H1, P2H2 and P3H2  
4 monoclonal antibodies were performed as described in [12]. Other primary antibodies  
5 used in this study are listed in **Supplementary Table 1**. Peroxidase- and  
6 fluorochrome-conjugated secondary antibodies were from Jackson ImmunoResearch.  
7 Gold-conjugated secondary antibodies were from Aurion (Wageningen, Netherlands).

8

9 **Cells.** PLC3 cells are a subclone of PLC/PRF/5 hepatoma cells [6]. PLC3 and Huh-  
10 7.5 [13] cells were authenticated by STR profiling and Multiplex Cell Authentication  
11 (Multiplexion) respectively, and cultured as previously described [14].

12

13 **Plasmids and transfection.** The plasmid pBlueScript SK(+) carrying the DNA of the  
14 full length genome of adapted gt3 Kernow C-1 p6 strain, (GenBank accession number  
15 JQ679013, kindly provided by S.U Emerson) was used [15]. The ORF3-null mutant  
16 (HEV-p6- $\Delta$ ORF3) and the 5R/5A mutant (HEV-p6-5R/5A) of HEV-p6 were generated  
17 as described in [16] and [8], respectively. Capped genomic HEV RNAs were prepared  
18 with the mMMESSAGE mMACHINE kit (Ambion) and delivered to PLC3 or Huh-7.5 cells  
19 by electroporation using a Gene Pulser Xcell<sup>TM</sup> apparatus (Bio-Rad) [6]. PLC3/HEV  
20 and Huh-7.5/HEV cells were electroporated with p6 RNA (20 $\mu$ g / 4.10<sup>6</sup> cells) whereas  
21 PLC3 mock and Huh-7.5 mock were electroporated in the absence of RNA.

22

23 **Indirect immunofluorescence.** At 6 days p.e. cells were immunostained as  
24 previously described [14]. Cells were then analyzed with a LSM 880 confocal laser-

1 scanning microscope (Zeiss) using a Plan Apochromat 63xOil/1.4N.A. objective. The  
2 images were processed using ImageJ and Fiji softwares.  
3 For high-resolution confocal analyses, images were acquired with an Airyscan module.  
4 Z-stacks acquisition were performed with a 0.15  $\mu\text{m}$  z-interval. The ORF2 confocal  
5 parameters were determined to optimize the dynamic range and avoid intensity  
6 saturation, and the same settings were applied for each sample. Images in the 3  
7 channels were recorded using Zen image collection software (Carl Zeiss Microscopy)  
8 and processed for high resolution reconstruction. 3D volumetric surface constructs  
9 were obtained using Imaris software (version 9.5.1; Oxford instruments, Belfast), by  
10 applying an intensity threshold for each channel. The images were then processed  
11 using Fiji software.

12

13 **Mander's overlap coefficient (MOC) determination.** Colocalization studies were  
14 performed by calculating the MOC using the JACoP plugin of Fiji software. For each  
15 calculation, at least 30 cells were analyzed to obtain a MOC mean. A MOC of 1  
16 indicates perfect overlap and 0 no overlap.

17

18 **Western blotting analysis.** Western blotting analyses were performed as described  
19 previously [6]. Target proteins were detected with specific antibodies (**Supplementary**  
20 **Table 1**) and corresponding peroxidase-conjugated secondary antibodies.

21

22 **Immunoprecipitations (IP).** Antibodies were bound to Tosylactivated M-280  
23 Dynabeads<sup>TM</sup> (Thermofisher) overnight at 37°C following the manufacturer's  
24 recommendations. Beads were washed and then incubated for 1h at room temperature  
25 with supernatants (heat-inactivated or Triton-treated), lysates or Triton-treated patient



1 sera. Beads were washed and then heated at 80°C for 20 min in Laemmli buffer.  
2 Proteins were separated by SDS-PAGE and ORF2 proteins were detected by WB  
3 using the 1E6 antibody.

4

5 **qIP and RT-qPCR.** For qIP experiments, samples were first immunoprecipitated as  
6 described above. Next, RNAs were extracted and quantified by RT-qPCR as described  
7 in [14].

8

9 **Immunoelectron microscopy.** Electroporated cells were fixed by incubation for 2 h  
10 with 4% paraformaldehyde in phosphate buffer (pH 7.6), washed twice with PBS (pH  
11 7.6), and centrifuged at 300 × g for 10 min. Cell pellets were embedded in 12% gelatin  
12 and infused with 2.3 M sucrose overnight at 4°C. Ultra-thin cryosections (90 nm) were  
13 cut at -110°C on a LEICA FC7 cryo-ultramicrotome. The sections were retrieved in a  
14 mixture of 2% methylcellulose and 2.3 M sucrose (1:1) and collected onto  
15 formvar/carbon-coated nickel grids. The gelatin was removed by incubation at 37°C,  
16 and the sections were incubated with primary antibodies (**Supplementary Table 1**).  
17 The grids were washed with PBS and then incubated with secondary antibodies  
18 conjugated to gold particles of 6 nm or 10 nm in diameter. The grids were washed with  
19 PBS, post-fixed in 1% glutaraldehyde and rinsed with distilled water. Contrast staining  
20 was achieved by incubating the grids with a 2% uranyl acetate/2% methylcellulose  
21 mixture (1:10). The sections were then examined under a transmission electron  
22 microscope operating at 100 keV (JEOL 1011). Electron micrographs were recorded  
23 with a digital camera driven by Digital Micrograph software (GMS 3, Gatan).

24

1 **Transferrin endocytosis.** PLC3/HEV and PLC3/HEV- $\Delta$ ORF3 cells were incubated  
2 with 25  $\mu$ g/ml of Alexa633-conjugated transferrin (TrF) at 37°C and fixed at indicated  
3 times. Cells were next permeabilized with methanol and TX, then stained with the  
4 P1H1 antibody. Cells were analyzed by confocal microscopy.

5  
6 **Silencing experiments.** At 3 days p.e., PLC3/HEV cells were transfected with small  
7 interfering RNA (siRNA) pools (Horizon) targeting Rab11a (ON-TARGETplus human  
8 Rab11a, gene 8766, siRNA SMARTpool) and Rab11b (ON-TARGETplus human  
9 Rab11b, gene 9230, siRNA SMARTpool) (siRab11) or with a nontargeting siRNA  
10 control (siCTL) by using RNAiMax reagent (Invitrogen) according to the manufacturer's  
11 instructions. The knockdown effects were determined at 72h post-transfection by  
12 immunofluorescence, western-blotting, RT-qPCR and virus titration.

13  
14 **Infectious titer determination.** Infectious titers were determined as described  
15 previously [14] by using Huh7.5 cells. ORF2-positive cells were quantified using an  
16 InCell 6000 confocal analyzer (GE Healthcare) and the Columbus image analysis  
17 software (Perkin Elmer).

## 1 **Results**

### 2 **Generation of monoclonal antibodies that specifically recognize the ORF2i** 3 **protein**

4 The ORF2 protein sequence contains 660 amino acids (aa) (**Fig. 1A**). Previously, we  
5 demonstrated that the first aa of ORF2i/intra, ORF2g and ORF2c proteins are L<sup>14</sup>, S<sup>34</sup>  
6 and S<sup>102</sup>, respectively [6,14]. The ORF2i/intra protein is not glycosylated whereas  
7 ORF2g/c proteins are N-glycosylated on <sup>137</sup>NLS and <sup>562</sup>NTT sequons [14] (**Fig. 1A**).  
8 We capitalized on these features to design two immunogen peptides (P1 and P2) for  
9 obtaining highly specific antibodies of the ORF2i form. The P1 peptide corresponds to  
10 the N-terminus of the ORF2i protein that is not present in the ORF2g/c form  
11 sequences. The P2 peptide corresponds to 14 aa covering the <sup>562</sup>NTT sequon that is  
12 not occupied by N-glycans on the ORF2i protein, in contrast to ORF2g/c proteins. We  
13 also designed a P3 peptide for obtaining antibodies recognizing the different forms of  
14 ORF2 (**Fig. 1A**). To verify the specificity between strains/genotypes, sequence  
15 alignments were carried out for each peptide (data not shown). Following mice  
16 immunization and hybridoma screening, one clone from P1 immunization (P1H1), two  
17 clones from P2 immunization (P2H1 and P2H2) and one clone from P3 immunization  
18 (P3H2) were selected and further characterized.

19 Specificity of generated antibodies was first analyzed in western blotting (WB)  
20 experiments with supernatants (SN) and lysates of PLC3 cells electroporated with the  
21 gt3 p6 strain (PLC3/HEV cells) and non-infected PLC3 cells, as antigens (**Fig. 1B**). SN  
22 of PLC3/HEV cells contains quasi-enveloped infectious HEV particles (ORF2i) but also  
23 large amounts of ORF2g/c proteins, whereas cells express the intracellular ORF2i form  
24 (ORF2intra) that assembles to form intracellular particles [6,14]. The 1E6 monoclonal  
25 antibody, which recognizes the three forms of ORF2 proteins [6] was used as a control.

1 The P1H1, P2H1 and P2H2 antibodies showed a highly specific recognition of the  
2 ORF2i protein without cross-reacting with the ORF2g/c proteins, as compared to the  
3 P3H2 and 1E6 antibodies that recognized the three forms (**Fig. 1B**).

4 Antibodies were next used in immunoprecipitation (IP) assays against heat-denatured  
5 (HD) SN and lysates of PLC3/HEV cells. In lysates, all antibodies immunoprecipitated  
6 the ORF2<sub>intra</sub> protein (**Fig. 1C**, bottom panel). In contrast, in SN, no ORF2 proteins  
7 were detected in IP-P2H1 and IP-P2H2 whereas the IP-P1H1 showed a highly specific  
8 recognition of the ORF2i protein, without cross-reaction with the ORF2g/c proteins  
9 (**Fig. 1C**, top panel), as compared to IP-P3H2 and IP-1E6 that displayed the three  
10 forms of ORF2. Thus, P1H1 specifically immunoprecipitates heat-denatured HEV  
11 particles.

12 HEV particles produced in cell culture are wrapped with lipids that mask the ORF2  
13 epitopes. In order to analyze the ability of antibodies to immunoprecipitate non-  
14 denatured particles, SN of PLC3/HEV cells was then treated with Triton X-100 (TX), or  
15 left untreated (TX-0%) before IP with P1H1 and P3H2 (**Fig. 1D**). In untreated samples,  
16 no ORF2 proteins were detected in IP-P1H1, whereas ORF2g/c proteins were  
17 immunoprecipitated by P3H2. In treated samples, the IP-P1H1 showed a highly  
18 sensitive and specific recognition of the ORF2i protein, whereas IP-P3H2 displayed  
19 the three forms of ORF2. Thereby, P1H1 specifically immunoprecipitates detergent-  
20 treated HEV particles.

21 We next analyzed by RT-qPCR the ability of P1H1 and P3H2 antibodies to  
22 immunocapture HEV particles in TX-treated SN. We found that P1H1 immunocaptured  
23 27% of total RNA input whereas P3H2 immunocaptures only 2% (**Fig. 1E**). These  
24 results indicate that P1H1 efficiently recognizes non-lipid-associated-particles and that  
25 its epitope is exposed on naked HEV particles.

1 Antibodies were also tested for their ability to neutralize non-enveloped particles but  
2 none of them displayed neutralizing activity (data not shown), indicating that, while  
3 exposed on HEV particles, the P1H1 epitope is not involved in HEV entry.  
4

#### 5 **Identification of HEV-induced subcellular structures**

6 We next performed double-label immunofluorescence and confocal analyses of  
7 PLC3/HEV cells using the anti-ORF2 antibodies and a polyclonal antibody directed  
8 against ORF3, a small protein that is associated with the quasi-enveloped viral particle  
9 and supports virion egress through the exosomal pathway [17,18]. ORF3 protein is  
10 palmitoylated at cysteine residues in its N-terminal region and is exposed to the  
11 cytosolic side of the membrane [19]. The anti-ORF2i antibodies (P1H1, P2H1 and  
12 P2H2) mainly displayed a perinuclear nugget-like ORF2 staining, whereas the P3H2  
13 and 1E6 antibodies showed a diffuse ER-like ORF2 staining in addition to the  
14 perinuclear nugget-like ORF2 staining (**Fig. 2A**). Of note, P3H2 and 1E6 antibodies  
15 recognize the different ORF2 isoforms notably the ORF2g/c forms which are proteins  
16 going through the secretory pathway [6,8,14].

17 For each antibody, we calculated the Mander's Overlap Coefficient (MOC) of either  
18 ORF2 staining in ORF3 staining (**Fig. 2B**, ORF2 in ORF3) or ORF3 staining in ORF2  
19 staining (**Fig. 2B**, ORF3 in ORF2). We found that the ORF3 protein staining highly  
20 overlapped with ORF2 for all antibodies, indicating that the ORF3 protein highly  
21 colocalizes with the ORF2 proteins (**Fig. 2B**, MOC ORF3 in ORF2). Moreover, the  
22 P1H1, P2H1 and P2H2 antibodies showed a higher MOC of ORF2 in ORF3 than that  
23 of P3H2 and 1E6, indicating that ORF3 protein mainly colocalizes with the ORF2i  
24 protein (**Fig. 2B**, ORF2 in ORF3). In line with this, super-resolution confocal  
25 microscopy analyses of PLC3/HEV cells stained with either P1H1 (ORF2i, **Fig. 2C**) or

1 P3H2 (ORF2<sup>tot</sup>, **Fig. 2D**) showed a total overlap of fluorescence intensities of ORF2i  
2 with ORF3 (**Fig. 2C**) whereas a shift of fluorescence intensities was observed between  
3 total ORF2 and ORF3 proteins (**Fig. 2D**).

4 Together, these results indicate that anti-ORF2 antibodies, and more specifically anti-  
5 ORF2i antibodies, recognize perinuclear ORF2-enriched structures that are in close  
6 proximity to the ORF3 protein.

7 Of note, all antibodies recognized ORF2 proteins from HEV-gt1 (Supplementary data,  
8 **Fig. S1**).

9 We then performed electron microscopy (EM) experiments, using immunogold labeling  
10 with P1H1, P2H2, P3H2 and 1E6 anti-ORF2 antibodies (visualized by 6 nm gold  
11 particles) of ultrathin cryosections of PLC3/HEV (**Fig. 3A**) and PLC3 mock (**Fig. S2**)  
12 cells. On cryosections of PLC3/HEV cells, the four antibodies specifically labeled two  
13 types of subcellular structures *i.e.* tubular structures and vesicular structures (**Fig. 3A**).  
14 Tubular structures displayed a homogeneous diameter of 20-25 nm. They were highly  
15 organized, often arranged in compact parallel arrays. Vesicular structures were larger  
16 and heterogeneous in size with a diameter of 50-250 nm. Both structures were mostly  
17 found in the vicinity of the nucleus and led to a nuclear deformation (**Fig. 3A**, P3H2,  
18 asterisk). In most cells, we observed an extensive membrane network containing  
19 tubular and vesicular structures (**Fig. 3B**, P1H1, P2H2 and 1E6) and in some cells,  
20 transverse and longitudinal sections of tubular structures were observed (**Fig. 3B**,  
21 P3H2). These results suggest that the perinuclear ORF2-enriched structures  
22 previously observed in confocal microscopy likely correspond to the tubular and  
23 vesicular structures observed in EM. Importantly, HEV-induced tubular and vesicular  
24 structures were also observed in Huh-7.5 cells (**Fig. S3**). In addition, these structures  
25 were not found in cryosections of PLC3 mock and Huh-7.5 mock cells. Together, these

1 results indicate that, during its lifecycle, HEV induces the formation of perinuclear  
2 ORF2-enriched ultrastructures in the host cell.

3 We next performed double immunogold labeling experiments with anti-ORF2  
4 (visualized by 6 nm gold particles) and anti-ORF3 (visualized by 10 nm gold particles)  
5 antibodies on cryosections of PLC3/HEV cells (**Fig. 4A**). We found a co-distribution of  
6 ORF3 and ORF2 proteins in vesicular and tubular structures, supporting the confocal  
7 microscopy analyses of ORF2/ORF3 co-localization (**Fig. 2**).

8 To further understand which viral determinant is important for the formation of HEV-  
9 induced subcellular structures, we transfected PLC3 cells with an ORF3-null mutant  
10 (HEV- $\Delta$ ORF3) [16] (**Fig. 4B**) and an ORF2 assembly mutant (HEV-5R/5A) [8] (**Fig.**  
11 **4C**). In the absence of ORF3 protein expression, HEV particle secretion is abolished  
12 [16] and ORF2 proteins accumulate in the cytosol (**Fig. 4B**). In the HEV-5R/5A mutant,  
13 the arginine residues of the ARM were replaced by alanine residues without affecting  
14 ORF3 expression. The 5R/5A mutations lead to an accumulation of ORF2 in the Golgi  
15 apparatus (**Fig. 4C**) and are deleterious for viral particle assembly [8]. Of note, HEV  
16 RNA replication is not altered in PLC3/HEV- $\Delta$ ORF3 and PLC3/HEV-5R/5A cells [8].  
17 Strikingly, in the absence of ORF3 expression (PLC3/HEV- $\Delta$ ORF3), cells displayed no  
18 perinuclear ORF2-enriched structures in confocal microscopy but rather a diffuse  
19 ORF2 staining. In EM, immunogold labeling revealed no vesicular or tubular ORF2-  
20 enriched ultrastructures but rather ORF2 proteins associated with regular cellular  
21 membranes likely derived from ER/GA compartment (**Fig. 4B**). Similarly, in  
22 PLC3/HEV-5R/5A cells, we observed no structures resembling the ORF2/ORF3-  
23 enriched ultrastructures as those observed in **Fig. 4A**, but ORF2 and ORF3 proteins  
24 were distributed in the cytosol close to common intracellular vesicles.

1 Together, these results indicate that, during its lifecycle, HEV induces the formation of  
2 subcellular structures that are dependent both on the ORF3 expression and on the  
3 capacity of ORF2i to assemble as capsids. Of note, we did not observe any structures  
4 resembling the ORF2/ORF3-enriched ultrastructures in cells transfected with a tagged-  
5 ORF1 replicon (data not shown), indicating that these structures are not induced by  
6 HEV replication. Therefore, the ORF2/ORF3-enriched ultrastructures are solely  
7 dependent on the ORF3 expression and ORF2 capsid protein assembly.

8

### 9 **HEV hijacks the Endocytic Recycling Compartment (ERC)**

10 To further characterize the HEV-induced subcellular structures, we next carried out an  
11 extensive immunofluorescence colocalization study of the ORF2i protein with cell  
12 pathway markers. Colocalizations were performed with the P1H1 anti-ORF2i antibody  
13 and antibodies directed against markers of cytoskeleton ( $\beta$ -tubulin and MTOC),  
14 secretory pathway (Calnexin and ERGIC 53), early endosomes (EEA1 and Rab5), late  
15 endosomes / multivesicular bodies (MVB) (Rab9a, CD81 and CD63), Endocytic  
16 Recycling Compartment (ERC) (Rab11, CD71, EHD1, MICAL-L1 and PACSIN2),  
17 peroxisome (PMP70 and Catalase), mitochondria (TOM-20) and lysosome (LAMP1)  
18 (**Fig. 5A** and **Fig. S4**). Colocalizations were quantitatively analyzed by calculating the  
19 MOC (**Fig. 5A**). As shown in **Fig. 5A** and **5B**, the ORF2i protein significantly co-  
20 distributes with markers of two different cell compartments *i.e.* the late endosomes and  
21 the ERC. Indeed, the MOCs of ORF2i with Rab9a, CD81 and CD63 were 0.44, 0.55  
22 and 0.37, respectively, indicating a medium colocalization between ORF2i and these  
23 cellular markers. Rab9a belongs to a class of small Rab GTPases which are effector  
24 proteins promoting exchanges between the late endosome pathway and the trans



1 Golgi network [20,21], whereas CD81 and CD63 are tetraspanins found in MVB, which  
2 are a compartment belonging to the late endosome pathway.

3 On the other hand, ORF2i strongly colocalized with cell markers of the ERC. This  
4 compartment is the keystone of the slow cellular recycling pathway. The ERC plays  
5 major roles in cellular metabolism and is subverted during infection by an increasing  
6 number of pathogens such as viruses [22,23]. The ERC constitutes a collection of  
7 tubular organelles that are close to the nucleus and is defined by the presence of the  
8 Rab11 GTPase and its effectors. Rab11 regulates recycling from the ERC and  
9 transport of cargo from the TGN to the plasma membrane [24–27]. Strikingly, ORF2i  
10 and Rab11 showed a MOC of 0.86 (**Fig. 5A**), indicating a strong colocalization. Indeed,  
11 super-resolution confocal microscopy analyses showed a total overlap of fluorescence  
12 intensities between ORF2i and Rab11 (**Fig. 5C**). ORF2i also strongly colocalized with  
13 CD71 (MOC=0.78) (**Fig. 5A**), the transferrin receptor that is a reference marker for the  
14 ERC [28]. This observation was further confirmed by high-resolution microscopy (**Fig.**  
15 **5D**).

16 Efficient recycling via the ERC relies on the integrity of a complex network of elongated,  
17 non-symmetrical endosomes known as tubular recycling endosomes (TRE). A family  
18 of proteins known as the C-terminal Eps15 homology domain (EHD1-4) proteins and  
19 EHD-interaction partners such as MICAL-L1 (Molecule Interacting with CasL-like1)  
20 and PACSIN2/Syndapin2, are involved in TRE biogenesis and control membrane  
21 recycling. Although ORF2i only displayed a weak co-localization with EHD1  
22 (MOC=0.28), it colocalized with MICAL-L1 (MOC=0.49) and PACSIN2 (MOC=0.63)  
23 (**Fig. 5A**). The colocalization of ORF2i with MICAL-L1 was further confirmed by high-  
24 resolution microscopy but showed a small shift of fluorescence intensities (**Fig. 5E**),

1 indicating that they are in close proximity to each other. Altogether, our data suggest  
2 that HEV likely subverts effectors of the cellular recycling machinery.  
3 On the other hand, although ORF2i did not colocalize with the MTOC (**Fig. 5A**), ORF2i-  
4 enriched structures were found in close proximity of the organizing center (**Fig. S4**).  
5 Of note, it has been shown that the MTOC and the ERC are two distinct structural  
6 entities closely related promoting endosomal trafficking [29].  
7 As shown for Rab11, CD71 and MICAL-L1, colocalization analyses in PLC3/HEV-  
8  $\Delta$ ORF3 cells, indicated that, in the absence of ORF3 expression, ORF2i no longer  
9 colocalizes with these cell markers (**Fig. 5B**). These results are in line with our above  
10 described observations on the importance of the ORF3 protein in the formation of HEV-  
11 induced subcellular structures (**Fig. 4**). Although some cellular markers were enriched  
12 in subcellular structures (*i.e.* CD81 and Rab11), staining of mock electroporated PLC3  
13 cells (PLC3 mock) showed similar subcellular localizations of other cell markers as in  
14 PLC3/HEV and PLC3/HEV- $\Delta$ ORF3 cells (**Fig. S5**), indicating that HEV infection does  
15 not induce a general cell markers redistribution.  
16 To strengthen our previous observations, we next performed a kinetics of  
17 colocalization with the P1H1 anti-ORF2i antibody and fluorochrome-conjugated  
18 transferrin in PLC3/HEV and PLC3/HEV- $\Delta$ ORF3 cells (**Fig. S6**). It has been shown  
19 that Transferrin (TrF) first binds to its receptor (CD71) at the cell membrane and then  
20 enters the cell through clathrin-mediated endocytosis. Once in the early endosomes,  
21 TrF-CD71 complexes return back to the cell surface through either a fast route going  
22 directly back to the plasma membrane, or a slower route delivering TrF-CD71  
23 complexes to the ERC before they are trafficked back to the cell surface [28]. In  
24 PLC3/HEV cells, the colocalization between transferrin and ORF2i readily increased  
25 over time and reached a MOC of 0.70 after 45 min (**Fig. S6A**), a value similar to that

1 found in **Fig. 5A** for its receptor. In contrast, in PLC3/HEV- $\Delta$ ORF3 cells, transferrin  
2 and ORF2i showed a reduced colocalization (MOC = 0.4), (**Fig. S6B**). Thus, during  
3 the HEV lifecycle, the ORF2i protein with the help of ORF3 protein, associates with a  
4 functional ERC compartment.

5 We carried out double immunogold labeling experiments by combining anti-ORF2  
6 (visualized by 10 nm gold particles) with anti-Rab11 or anti-CD71 (visualized with 6 nm  
7 gold particles) antibodies, and anti-ORF3 (10 nm) with anti-CD81 (6 nm) antibodies on  
8 cryosections of PLC3/HEV (**Fig. 6**) and PLC3 mock (**Fig. S7**) cells. In PLC3/HEV cells,  
9 we found a co-distribution of ORF2 with Rab11 and CD71 and a co-distribution of  
10 ORF3 with CD81 in vesicular and tubular structures, supporting our confocal  
11 microscopy analyses. These results indicate that the HEV-induced vesicular and  
12 tubular structures likely derive from ERC and TRE compartments. Moreover, the  
13 detection of the tetraspanin CD81 confirms the presence of membranes in vesicular  
14 and tubular structures. Since ORF3 protein is a key player in the biogenesis of eHEV  
15 [30] and CD81 is present on the quasi-envelope [31], the ORF2/ORF3-enriched  
16 ultrastructures that we identified likely correspond to eHEV viral factories. In line with  
17 this, P1H1, P2H2, P3H2 and 1E6 anti-ORF2 immunolabeling on cryosections of  
18 PLC3/HEV cells highlighted in these ORF2-enriched membranous compartments  
19 numerous viral-like particles of ~25 nm in diameter (**Fig. 7**).

20 Finally, to confirm that the ERC plays a central role in the HEV lifecycle, we conducted  
21 functional studies. PLC3/HEV cells were transfected with small interfering RNA  
22 (siRNA) targeting Rab11a and Rab11b isoforms (siRab11) or non-targeting siRNA  
23 (siCTL) (**Fig. 8**). The effect of Rab11 silencing on ORF2 expression was analyzed by  
24 IF (**Fig. 8A**) and WB (**Fig. 8B**). The effect of Rab11 silencing on viral production was  
25 analyzed by quantification of secreted viral RNA (**Fig. 8C**) and infectious titers (**Fig.**

1 **8D)**. Although Rab11 silencing did not affect the ORF2 expression level, we found that  
2 it abrogated the formation of nugget-like structures to the benefit of ORF2-enriched  
3 stringy structures mostly localized around the nucleus. These stringy structures did not  
4 co-distribute with ORF3, CD71 nor MICAL-L1, which display a more diffuse pattern  
5 upon Rab11 silencing. Moreover, extracellular RNA levels and infectious titers were  
6 reduced in siRab11-transfected PLC3/HEV cells, as compared to control cells (NT and  
7 siCTL). Altogether, these results confirm that the hijacking of the recycling  
8 compartment by HEV is pivotal for producing viral particles.

9

## 1 **Discussion**

2 The study performed here with the help of home-made anti-ORF2 antibodies, notably  
3 antibodies recognizing the particle associated-ORF2<sub>i</sub> form, and HEV-producing cells  
4 brings new insights into the HEV-host cell interactions.

5 Previously, we and other demonstrated that during HEV infection, different isoforms of  
6 the ORF2 capsid protein are secreted [6,7]. Indeed, by combining the gt3 p6 strain [15]  
7 and the highly transfectable PLC3 cells, we identified 3 forms of the ORF2 capsid  
8 protein that perform distinct functions in the HEV lifecycle and display different  
9 sequences, post-translational modifications and subcellular localization [6,14]. The  
10 ORF2<sub>i</sub> form is the component of infectious particles and derives from the assembly of  
11 intracellular ORF2<sub>i</sub> (ORF2<sub>intra</sub>) protein [8]. The ORF2<sub>i</sub> and ORF2<sub>intra</sub> proteins are not  
12 glycosylated and display the same sequence starting at Leu14 corresponding to the  
13 middle of the signal peptide (Fig. 1). Although it has been shown that ORF2<sub>i</sub> protein  
14 might be produced from an additional start codon [7], we recently found that an  
15 Arginine-Rich Motif (ARM) located in the ORF2 N-terminal region regulates the dual  
16 topology and functionality of ORF2 signal peptide, leading to the production of either  
17 the cytosolic infectious ORF2<sub>i</sub> that is not processed by the signal peptidase or the  
18 ORF2<sub>g/c</sub> forms that are generated by translocation into the ER lumen [8]. The  
19 glycosylated ORF2<sub>g/c</sub> forms, which are secreted in very large amounts in culture  
20 supernatants and infected patient sera, are not associated with infectious virions [6],  
21 but inhibit antibody-mediated neutralization [7]. These glycosylated forms are  
22 produced by translocation of ORF2 proteins into the secretory pathway where they are  
23 N-glycosylated on two N-x-S/T sequons [14], O-glycosylated and sialylated, and  
24 quickly secreted [6,7]. They are cleaved by cellular proteases notably by the proprotein  
25 convertase furin [8]. Here, we capitalized on these distinctive features to generate and

1 characterize four anti-ORF2 monoclonal antibodies, including three antibodies (P1H1,  
2 P2H1 and P2H2) directed against the ORF2i form and one antibody (P3H2) directed  
3 against the different ORF2 isoforms (Fig. 1). Analyses by WB and IP of HEV-infected  
4 cell lysates showed that the four antibodies equally recognize the intracellular ORF2  
5 proteins. In contrast, analyses on HEV-infected cell supernatants, which contain some  
6 ORF2i proteins but also huge amounts of ORF2g/c proteins, demonstrated that the  
7 P1H1, P2H1 and P2H2 antibodies specifically recognize the ORF2i protein without  
8 cross-reaction with the glycosylated ORF2 forms. Importantly, we found that the P1H1  
9 antibody recognizes non-lipid-associated HEV particles. Therefore, the P1H1 antibody  
10 might represent a good candidate for diagnosis purposes. More generally, the  
11 antibodies that we generated in this study represent unique tools for deciphering the  
12 biogenesis mechanisms of ORF2 isoforms and their precise functions in the HEV  
13 lifecycle.

14 Structure of the ORF2 N-terminal domain has not been resolved yet. However, based  
15 on its potential interaction with RNA, it is believed that this domain is orientated toward  
16 the interior cavity of particles. In our study, we found that the P1H1 antibody that  
17 recognizes the N-terminal domain of ORF2 (Fig. 1A) efficiently captures delipidated  
18 HEV particles (Fig. 1D and 1E). Although we cannot exclude that the P1H1 antibody  
19 recognizes partially assembled ORF2i proteins, our results suggest that the ORF2 N-  
20 terminus might be exposed on the viral surface. Consistent with this observation, we  
21 recently found that the ARM located in the ORF2 N-terminal region promotes ORF2  
22 membrane association that is likely essential for particle assembly [8]. Therefore, we  
23 hypothesize that the ORF2 N-terminus is associated with eHEV-enveloping lipids and  
24 removal of lipids by detergent treatment unmasks ORF2 N-terminal epitopes, including  
25 the P1H1 epitope.

1 In the present study, we identified HEV-induced subcellular structures that are  
2 enriched in ORF2 and ORF3 proteins. Indeed, we found that ORF2 and ORF3 proteins  
3 highly co-localize in infected cells. In addition, thanks to the P1H1 antibody that  
4 specifically recognizes the particle-associated ORF2i protein, we demonstrated that  
5 ORF2i and ORF3 proteins are tightly co-distributed in perinuclear nugget-like  
6 structures, as observed in confocal microscopy. In the absence of ORF3 expression,  
7 we observed a redistribution of the ORF2i protein in cytosolic dot-like structures, and  
8 in the absence of ORF2 assembly, the ORF3 protein was as well redistributed through  
9 the cytosol, indicating that both proteins are tightly connected. Ultrastructural analyses  
10 by EM of cryosections of HEV-replicating cells showed that the ORF2/ORF3 enriched  
11 structures correspond to a network of vesicular and tubular components in the vicinity  
12 of the nucleus. While vesicular structures were heterogeneous in their organization  
13 and their size *i.e.* 50-250 nm, the tubular structures formed regular parallel arrays and  
14 displayed a homogeneous diameter of 20-25nm, corresponding to that of intracellular  
15 HEV-like particles observed in cryosections. Therefore, we hypothesize that tubular  
16 structures might correspond to virion precursors. Vesicular and tubular structures were  
17 found in both PLC3/HEV and Huh-7.5/HEV cells, indicating that they are not cell type-  
18 specific. Although difficult to set up, it would be also interesting to analyze whether this  
19 kind of structures is formed in other infectious models such as cells replicating gt1 or  
20 in HEV-infected primary cells.

21 Interestingly, in the absence of ORF2 assembly or ORF3 expression, no perinuclear  
22 nugget-like shapes were observed in confocal microscopy, nor vesicular and tubular  
23 structures in EM. ORF3 protein is not involved in virion assembly but plays an essential  
24 role in exosomal release and acquisition of the quasi-envelope around the neo-  
25 synthesized viral particles [32]. We can therefore speculate that the observed

1 structures represent viral factories in which assembled particles acquire their  
2 membrane through an ORF2-ORF3 interaction.

3 Due to the scarcity of analytical tools until recently, only little is known about subcellular  
4 localization of HEV proteins in infected cells and about the host factors involved in the  
5 various steps of the HEV lifecycle. The subcellular localization of the ORF1 polyprotein,  
6 which contains domains involved in viral RNA synthesis, has been studied within  
7 heterologous expression systems that showed a membrane association and a  
8 colocalization with ER and the ER-Golgi intermediate compartment [33]. A more recent  
9 study using HA-tagged replicons and full-length genomes found replication complexes  
10 in cytoplasmic dot-like structures overlapping significantly with ORF2 and ORF3  
11 proteins as well as with the CD63 and CD151 exosomal markers [34]. The ORF2  
12 protein has been also studied in heterologous systems and found in different cell  
13 compartments *i.e.* plasma membrane, ER and cytoplasmic compartment [35,36]. Later  
14 on, ORF2 characterization in infectious systems led to the identification of ORF2  
15 isoforms which are found partitioned in different subcellular compartments. The  
16 glycosylated ORF2 forms go through the secretory pathway. The ORF2i form is mainly  
17 present in the cytosolic compartment but is also translocated into the nucleus of  
18 infected cells [7,8,14,34,37]. The ORF3 protein, which plays a pivotal role in viral  
19 egress, has been found in association with microtubules [38,39]. It has also been  
20 localized in early and recycling endosomes [40] as well as MVB [17]. Indeed, ORF3  
21 interacts with the MVB-resident tumor susceptibility gene 101 (Tsg101) that is a  
22 component of the endosomal sorting complexes required for transport (ESCRT)  
23 pathway [18,41,42]. A recent study showed that ORF3 is palmitoylated at cysteine  
24 residues in its N-terminal region and is exposed to the cytosolic side of the intracellular  
25 membranes [19]. Here, thanks to the specificity of our antibodies, notably the P1H1



1 antibody, we performed an extensive colocalization study of ORF2i proteins with  
2 different cell markers. In accordance with previous studies, we found a partial co-  
3 localization of ORF2i with late endosome markers notably with the tetraspanin CD81,  
4 a marker of MVB and exosomes. Since ORF1 and ORF3 proteins have been also  
5 shown to colocalize with MVB markers, our findings strengthen the hypothesis of a  
6 close connection between HEV replication and assembly sites [34]. Importantly, we  
7 identified a strong colocalization of ORF2i with several markers of the recycling  
8 compartment, which was abrogated upon Rab11 silencing. ERC is involved in several  
9 stages of the lifecycle of a number of DNA and RNA viruses, with Rab11 being a central  
10 player in most of these processes [23]. ERC notably mediates viral transport, assembly  
11 and egress *e.g.* it is involved in the envelopment of herpes simplex-1 capsids [43] or  
12 contributes to the transport of HCV virions towards the plasma membrane [44]. Here,  
13 we demonstrated that HEV particle secretion depends on a functional ERC.  
14 Interestingly, it has been shown that ERC hijacking is associated with membrane  
15 remodeling upon infection. Cholesterol accumulates at the ERC during Influenza A  
16 virus (IAV) infection, or Rab11 redistributes from dot structures to large aggregates  
17 during infection with several viruses including IAV [23]. Ultrastructural changes of these  
18 ERC membrane remodeling were poorly investigated to date. In our study, we  
19 demonstrated that HEV is a new candidate in the list of viruses hijacking the ERC.  
20 Importantly, we found that viral proteins and recycling compartment markers are co-  
21 distributed in perinuclear structures found in ultrastructural analyses as a network of  
22 vesicular and tubular structures. To our knowledge, this kind of structures has never  
23 been described before and might be the hallmark of HEV infection.

24

25

1 **Figure legends**

2

3 **Fig 1: Generation of monoclonal antibodies that specifically recognize the ORF2i**

4 **protein. (A)** Sequence of ORF2 proteins. The line corresponds to the signal peptide.

5 N-glycosylation sites are highlighted in yellow. P1, P2 and P3 peptides are highlighted

6 in blue, orange and purple, respectively. The dashed line corresponds to the 1E6

7 epitope. **(B)** Detection of ORF2 proteins in supernatants (SN) and lysates (cells) of

8 PLC3/HEV cells (+) and non-infected PLC3 cells (-) by WB. **(C)** Immunoprecipitation

9 of ORF2 proteins in heat-denatured (HD, 20min at 80°C) SN and lysates of PLC3/HEV

10 cells. An anti-HCV E2 envelope protein (H52) was used as a negative control (CTL).

11 ORF2 proteins were detected by WB with the 1E6 antibody (WB 1E6) **(D)** IP of SN

12 treated for 30min with Triton X-100 (TX-0.1%, TX-1%), or left untreated (TX-0%). Input

13 used for IP are shown on the left. ORF2 proteins were detected by WB 1E6 **(E)** SN of

14 PLC3/HEV cells was treated with TX-0.5% and immunoprecipitated with the P1H1,

15 P3H2 or isotype control antibodies. Half of the IP was analyzed by WB 1E6 (top panel)

16 and the other half was processed for RNA extraction and HEV RNA quantification

17 (bottom panel). Results are expressed as percent of immunocaptured HEV RNA

18 copies compared to the total input. (B-E) Molecular mass markers are indicated on the

19 right (kDa). For clarity and conciseness concerns, blots were cropped.

20

21 **Fig 2: Subcellular structures recognized by anti-ORF2 antibodies. (A)** PLC3/HEV

22 cells were fixed, permeabilized with cold Methanol and TX-0.5% and double-stained

23 with indicated anti-ORF2 and anti-ORF3 antibodies. Red = ORF2; Green = ORF3; Blue

24 = DAPI. Staining were analyzed by confocal microscopy. Scale bar, 20µm. **(B)**

25 Mander's Overlap Coefficients (MOC) of the ORF2 labeling in the ORF3 labeling

1 (ORF2 in ORF3, dark grey) and MOC of the ORF3 labeling in the ORF2 labeling (ORF3  
2 in ORF2, light grey). (C-D) PLC3/HEV cells were co-stained anti-ORF3 and P1H1 (C)  
3 or P3H2 (D) and analyzed by confocal microscopy with a high resolution Airyscan  
4 module. On the top, volume rendering of the 3D z-stacks (Surfacing) using Imaris are  
5 shown to visualize the ORF2/ORF3 substructures. In the middle, z-stacks are shown.  
6 On the bottom, line graphs show the fluorescence intensities of ORF2 and ORF3  
7 staining measured every 50 nm across the region of interest highlighted by the white  
8 line in the micrograph shown on the left. Scale bars show the indicated length.

9

10 **Fig 3: Identification of HEV-induced vesicular and tubular structures. (A)**

11 Transmission electron microscopy of PLC3/HEV cells cryosections immunogold-  
12 labeled with the indicated antibodies. Arrows highlight vesicular and tubular structures.  
13 N, nucleus. (B) Networks containing both vesicular and tubular structures are shown.

14

15 **Fig 4: HEV-induced subcellular structures are dependent on the expression of**

16 **ORF3 protein and assembly of ORF2 capsid proteins.** Cryosections of PLC3/HEV

17 (A), PLC3/HEV- $\Delta$ ORF3 (B) and PLC3/HEV-5R/5A (C) cells were processed for double

18 immunogold labeling with anti-ORF2 (visualized by 6 nm gold particles) and anti-ORF3

19 (visualized by 10 nm gold particles) antibodies, as indicated. Cryosections were next

20 analyzed by EM. ORF2 proteins are indicated by black arrows and ORF3 proteins by

21 arrowheads. N, nucleus. Representative confocal images of double-stained cells are

22 shown on the left. HEV- $\Delta$ ORF3 is an ORF3-null mutant. HEV-5R/5A is an ORF2

23 assembly mutant.

24

1 **Fig 5: Colocalization analysis of the ORF2i protein with different cell markers.**

2 PLC3/HEV and PLC3/HEV- $\Delta$ ORF3 cells were fixed, permeabilized with Methanol and  
3 TX-0.5% and double-stained with P1H1 and anti-cell markers antibodies, as indicated.  
4 **(A)** Mander's Overlap Coefficients (MOC) of ORF2 and cell marker labeling ( $n > 30$   
5 cells). Co-staining showing a low MOC are in light grey and those showing a medium  
6 MOC are in middle grey. Co-staining of PLC3/HEV cells showing a MOC  $> 0.4$  are in  
7 dark grey and representative confocal images are shown in **(B, Top)**. The co-staining  
8 of PLC3/HEV- $\Delta$ ORF3 cells with P1H1 and antibodies directed against markers of  
9 recycling compartment are also shown in **(B, bottom)**. Staining were analyzed by  
10 confocal microscopy. Scale bar, 20 $\mu$ m. PLC3/HEV cells double-stained with P1H1 and  
11 anti-Rab11 **(C)**, anti-CD71 **(D)** or anti-MICAL-L1 **(E)** antibodies were next analyzed by  
12 confocal microscopy with a high resolution Airyscan module. On the top, volume  
13 rendering of the 3D z-stacks (Surfacing) using Imaris are shown to better visualize the  
14 stained substructures. In the middle, z-stacks are shown. On the bottom, line graphs  
15 show the fluorescence intensities of ORF2i and Rab11/CD71/MICAL-L1 staining  
16 measured every 50 nm across the region of interest highlighted by the white line in the  
17 micrograph shown on the left. Scale bars show the indicated length. Red = ORF2;  
18 Green = cell marker; Blue = DAPI.

19

20 **Fig 6: EM analysis of the co-distribution of ORF2 and ORF3 proteins with cell**

21 **markers.** Cryosections of PLC3/HEV cells were processed for double immunogold  
22 labeling with anti-ORF2 or anti-ORF3 (visualized by 10 nm gold particles) and anti-  
23 Rab11, anti-CD71 or anti-CD81 (visualized by 6 nm gold particles) antibodies, as  
24 indicated. Cryosections were next analyzed by EM. ORF2 and ORF3 proteins are  
25 indicated by black arrows and cell markers by arrowheads.

1  
2  
3  
4  
5  
6  
7  
8  
9  
10  
11  
12  
13  
14  
15  
16  
17  
18  
19

**Fig 7: Visualization of intracellular HEV like-particles.** Cryosections of PLC3/HEV cells were immunogold-labeled with the indicated antibodies and analyzed by EM. On the right column, particles were highlighted by colorization in yellow.

**Fig 8: Effect of Rab11 silencing on protein expression and HEV particle secretion.** PLC3/HEV cells were transfected with siRNA targeting Rab11a and Rab11b (siRab11), with a non-targeting siRNA control (siCTL) or left non-transfected (NT). Non-transfected PLC3 mock were used as controls (bottom panel). At 72h post-transfection, cells were analyzed by IF (**A**) and WB (**B**) using the indicated antibodies. Staining were analyzed by confocal microscopy. Scale bar, 20 $\mu$ m. Red = ORF2 stained by P1H1; Green = ORF3 or cell marker; Blue = DAPI. (**C**) Quantification of HEV RNA in SN of transfected cells was performed by direct RT-qPCR (SN) and after IP with the P1H1 antibody (qIP-P1H1). (**D**) Production of infectious particles in SN of transfected cells was evaluated by viral titration. Results are shown as relative infectious titer (in %) related to NT supernatant.

1 **ACKNOWLEDGMENTS**

2 This work was supported by the French agency ANRS-Maladies infectieuses  
3 émergentes. This work was also supported by the Pasteur Institute of Lille, Région  
4 Hauts-de-France, Inserm-transfert and the University of Tours. C.B. and K.H. were  
5 supported by a fellowship from the ANRS. C.C. and M.F. were supported by the  
6 Pasteur Institute of Lille and Région Hauts-de-France. C.C. was also supported by  
7 Inserm-transfert. We thank Suzanne U. Emerson (NIH, USA), Jérôme Gouttenoire  
8 (University of Lausanne) and Ralf Bartenschlager (University of Heidelberg) for  
9 providing us with reagents. We thank Valentin de Masson d'Autume for his technical  
10 contribution.

11

1  
2

## References

3

4 [1] Kamar N, Izopet J, Pavio N, Aggarwal R, Labrique A, Wedemeyer H, et al.  
5 Hepatitis E virus infection. *Nature Reviews Disease Primers* 2017;3:17086.  
6 <https://doi.org/10.1111/trf.13355>.

7 [2] Doceul V, Bagdassarian E, Demange A, Pavio N. Zoonotic Hepatitis E Virus:  
8 Classification, Animal Reservoirs and Transmission Routes. *Viruses* 2016;8:270.  
9 <https://doi.org/10.3390/v8100270>.

10 [3] Horvatits T, Wiesch JS zur, Lütgehetmann M, Lohse AW, Pischke S. The Clinical  
11 Perspective on Hepatitis E. *Viruses* 2019;11:617–9.  
12 <https://doi.org/10.3390/v11070617>.

13 [4] Aslan AT, Balaban HY. Hepatitis E virus: Epidemiology, diagnosis, clinical  
14 manifestations, and treatment. *World J Gastroentero* 2020;26:5543–60.  
15 <https://doi.org/10.3748/wjg.v26.i37.5543>.

16 [5] Nimgaonkar I, Ding Q, Schwartz RE, Ploss A. Hepatitis E virus: advances and  
17 challenges. *Nature Reviews Gastroenterology & Hepatology* 2018;15:96–110.  
18 <https://doi.org/10.1038/nrgastro.2017.150>.

19 [6] Montpellier C, Wychowski C, Sayed IM, Meunier J-C, Saliou J-M, Ankavay M, et  
20 al. Hepatitis E Virus Lifecycle and Identification of 3 Forms of the ORF2 Capsid  
21 Protein. *Gastroenterology* 2018;154:211-223.e8.  
22 <https://doi.org/10.1053/j.gastro.2017.09.020>.

23 [7] Yin X, Ying D, Lhomme S, Tang Z, Walker CM, Xia N, et al. Origin, antigenicity,  
24 and function of a secreted form of ORF2 in hepatitis E virus infection. *Proceedings of*  
25 *the National Academy of Sciences of the United States of America*  
26 2018;3:201721345–6. <https://doi.org/10.1073/pnas.1721345115>.

27 [8] Hervouet K, Ferrié M, Ankavay M, Montpellier C, Camuzet C, Alexandre V, et al.  
28 The fate of Hepatitis E virus capsid protein is regulated by an Arginine-Rich Motif.  
29 *Biorxiv* 2021:2021.05.26.445820. <https://doi.org/10.1101/2021.05.26.445820>.

30 [9] Meister TL, Bruening J, Todt D, Steinmann E. Cell culture systems for the study of  
31 hepatitis E virus. *Antiviral Research* 2019;163:34–49.  
32 <https://doi.org/10.1016/j.antiviral.2019.01.007>.

33 [10] Ju X, Ding Q. Hepatitis E Virus Assembly and Release. *Viruses* 2019;11:539–13.  
34 <https://doi.org/10.3390/v11060539>.

35 [11] Harak C, Lohmann V. Ultrastructure of the replication sites of positive-strand  
36 RNA viruses. *Virology* 2015;479:418–33. <https://doi.org/10.1016/j.virol.2015.02.029>.

- 1 [12] Talmont F, Moulédous L, Baranger M, Gomez-Brouchet A, Zajac J-M, Deffaud  
2 C, et al. Development and characterization of sphingosine 1-phosphate receptor 1  
3 monoclonal antibody suitable for cell imaging and biochemical studies of endogenous  
4 receptors. *PLoS ONE* 2019;14:e0213203-19.  
5 <https://doi.org/10.1371/journal.pone.0213203>.
- 6 [13] Blight KJ, Mckeating JA, Rice CM. Highly Permissive Cell Lines for Subgenomic  
7 and Genomic Hepatitis C Virus RNA Replication. *Journal of Virology* 2002;76:13001–  
8 14. <https://doi.org/10.1128/jvi.76.24.13001-13014.2002>.
- 9 [14] Ankavay M, Montpellier C, Sayed IM, Saliou J-M, Wychowski C, Saas L, et al.  
10 New insights into the ORF2 capsid protein, a key player of the hepatitis E virus  
11 lifecycle. *Scientific Reports* 2019;9:6243. [https://doi.org/10.1038/s41598-019-42737-](https://doi.org/10.1038/s41598-019-42737-2)  
12 2.
- 13 [15] Shukla P, Nguyen HT, Faulk K, Mather K, Torian U, Engle RE, et al. Adaptation  
14 of a genotype 3 hepatitis E virus to efficient growth in cell culture depends on an  
15 inserted human gene segment acquired by recombination. *Journal of Virology*  
16 2012;86:5697–707. <https://doi.org/10.1128/jvi.00146-12>.
- 17 [16] Graff J, Nguyen H, Yu C, Elkins WR, Claire MS, Purcell RH, et al. The Open  
18 Reading Frame 3 Gene of Hepatitis E Virus Contains a cis-Reactive Element and  
19 Encodes a Protein Required for Infection of Macaques. *Journal of Virology*  
20 2005;79:6680–9. <https://doi.org/10.1128/jvi.79.11.6680-6689.2005>.
- 21 [17] Nagashima S, Jirintai S, Takahashi M, Kobayashi T, Tanggis, Nishizawa T, et al.  
22 Hepatitis E virus egress depends on the exosomal pathway, with secretory  
23 exosomes derived from multivesicular bodies. *Journal of General Virology*  
24 2014;95:2166–75. <https://doi.org/10.1099/vir.0.066910-0>.
- 25 [18] Nagashima S, Takahashi M, Jirintai, Tanaka T, Yamada K, Nishizawa T, et al. A  
26 PSAP motif in the ORF3 protein of hepatitis E virus is necessary for virion release  
27 from infected cells. *Journal of General Virology* 2011;92:269–78.  
28 <https://doi.org/10.1099/vir.0.025791-0>.
- 29 [19] Gouttenoire J, Pollán A, Abrami L, Oechsli N, Mauron J, Matter M, et al.  
30 Palmitoylation mediates membrane association of hepatitis E virus ORF3 protein and  
31 is required for infectious particle secretion. *PLoS Pathogens* 2018;14:e1007471-24.  
32 <https://doi.org/10.1371/journal.ppat.1007471>.
- 33 [20] Lombardi D, Soldati T, Riederer MA, Goda Y, Zerial M, Pfeffer SR. Rab9  
34 functions in transport between late endosomes and the trans Golgi network. *Embo J*  
35 1993;12:677–82. <https://doi.org/10.1002/j.1460-2075.1993.tb05701.x>.
- 36 [21] Hutagalung AH, Novick PJ. Role of Rab GTPases in Membrane Traffic and Cell  
37 Physiology. *Physiol Rev* 2011;91:119–49.  
38 <https://doi.org/10.1152/physrev.00059.2009>.
- 39 [22] Maxfield FR, McGraw TE. Endocytic recycling. *Nature Reviews Molecular Cell*  
40 *Biology* 2004;5:121–32. <https://doi.org/10.1038/nrm1315>.



- 1 [23] Vale-Costa S, Amorim M. Recycling Endosomes and Viral Infection. *Viruses*  
2 2016;8:64–29. <https://doi.org/10.3390/v8030064>.
- 3 [24] Ullrich O, Reinsch S, Urbé S, Zerial M, Parton RG. Rab11 regulates recycling  
4 through the pericentriolar recycling endosome. *J Cell Biology* 1996;135:913–24.  
5 <https://doi.org/10.1083/jcb.135.4.913>.
- 6 [25] Stone R, Hayashi T, Bajimaya S, Hodges E, Takimoto T. Critical role of Rab11a-  
7 mediated recycling endosomes in the assembly of type I parainfluenza viruses.  
8 *Virology* 2016;487:11–8. <https://doi.org/10.1016/j.virol.2015.10.008>.
- 9 [26] Bhui T, Roy JK. Rab11 in disease progression. *Int J Mol Cell Medicine*  
10 2015;4:1–8.
- 11 [27] Guichard A, Nizet V, Bier E. RAB11-mediated trafficking in host–pathogen  
12 interactions. *Nat Rev Microbiol* 2014;12:624–34. <https://doi.org/10.1038/nrmicro3325>.
- 13 [28] Mayle KM, Le AM, Kamei DT. The intracellular trafficking pathway of transferrin.  
14 *Biochimica Et Biophysica Acta Bba - Gen Subj* 2012;1820:264–81.  
15 <https://doi.org/10.1016/j.bbagen.2011.09.009>.
- 16 [29] Hehnly H, Chen C-T, Powers CM, Liu H-L, Doxsey S. The Centrosome  
17 Regulates the Rab11- Dependent Recycling Endosome Pathway at Appendages of  
18 the Mother Centriole. *Curr Biol* 2012;22:1944–50.  
19 <https://doi.org/10.1016/j.cub.2012.08.022>.
- 20 [30] Yang Y-L, Nan Y-C. Open reading frame 3 protein of hepatitis E virus: Multi-  
21 function protein with endless potential. *World J Gastroentero* 2021;27:2458–73.  
22 <https://doi.org/10.3748/wjg.v27.i20.2458>.
- 23 [31] Nagashima S, Takahashi M, Kobayashi T, Tanggis, Nishizawa T, Nishiyama T,  
24 et al. Characterization of the Quasi-Enveloped Hepatitis E Virus Particles Released  
25 by the Cellular Exosomal Pathway. *Journal of Virology* 2017;91.  
26 <https://doi.org/10.1128/jvi.00822-17>.
- 27 [32] Glitscher M, Hildt E. Hepatitis E virus egress and beyond – the manifold roles of  
28 the viral ORF3 protein. *Cell Microbiol* 2021:e13379.  
29 <https://doi.org/10.1111/cmi.13379>.
- 30 [33] Perttilä J, Spuul P, Ahola T. Early secretory pathway localization and lack of  
31 processing for hepatitis E virus replication protein pORF1. *Journal of General*  
32 *Virology* 2013;94:807–16. <https://doi.org/10.1099/vir.0.049577-0>.
- 33 [34] Szkolnicka D, Pollán A, Silva ND, Oechslin N, Gouttenoire J, Moradpour D.  
34 Recombinant Hepatitis E Viruses Harboring Tags in the ORF1 Protein. *J Virol*  
35 2019;93. <https://doi.org/10.1128/jvi.00459-19>.
- 36 [35] Surjit M, Jameel S, Lal SK. Cytoplasmic localization of the ORF2 protein of  
37 hepatitis E virus is dependent on its ability to undergo retrotranslocation from the

- 1 endoplasmic reticulum. *Journal of Virology* 2007;81:3339–45.  
2 <https://doi.org/10.1128/jvi.02039-06>.
- 3 [36] Zafrullah M, Ozdener MH, Kumar R, Panda SK, Jameel S. Mutational analysis of  
4 glycosylation, membrane translocation, and cell surface expression of the hepatitis E  
5 virus ORF2 protein. *Journal of Virology* 1999;73:4074–82.
- 6 [37] Lenggenhager D, Gouttenoire J, Malehmir M, Bawohl M, Honcharova-Biletska H,  
7 Kreutzer S, et al. Visualization of hepatitis E virus RNA and proteins in the human  
8 liver. *Journal of Hepatology* 2017;67:471–9.  
9 <https://doi.org/10.1016/j.jhep.2017.04.002>.
- 10 [38] Zafrullah M, Ozdener MH, Panda SK, Jameel S. The ORF3 protein of hepatitis E  
11 virus is a phosphoprotein that associates with the cytoskeleton. *Journal of Virology*  
12 1997;71:9045–53.
- 13 [39] Kannan H, Fan S, Patel D, Bossis I, Zhang Y-J. The hepatitis E virus open  
14 reading frame 3 product interacts with microtubules and interferes with their  
15 dynamics. *Journal of Virology* 2009;83:6375–82. <https://doi.org/10.1128/jvi.02571-08>.
- 16 [40] Chandra V, Kar-Roy A, Kumari S, Mayor S, Jameel S. The Hepatitis E Virus  
17 ORF3 Protein Modulates Epidermal Growth Factor Receptor Trafficking, STAT3  
18 Translocation, and the Acute-Phase Response  $\nabla$ . *J Virol* 2008;82:7100–10.  
19 <https://doi.org/10.1128/jvi.00403-08>.
- 20 [41] Emerson SU, Nguyen HT, Torian U, Burke D, Engle R, Purcell RH. Release of  
21 genotype 1 hepatitis E virus from cultured hepatoma and polarized intestinal cells  
22 depends on open reading frame 3 protein and requires an intact PXXP motif. *Journal*  
23 *of Virology* 2010;84:9059–69. <https://doi.org/10.1128/jvi.00593-10>.
- 24 [42] Kenney SP, Wentworth JL, Heffron CL, Meng X-J. Replacement of the hepatitis  
25 E virus ORF3 protein PxxP motif with heterologous late domain motifs affects virus  
26 release via interaction with TSG101. *Virology* 2015;486:198–208.  
27 <https://doi.org/10.1016/j.virol.2015.09.012>.
- 28 [43] Hollinshead M, Johns HL, Sayers CL, Gonzalez-Lopez C, Smith GL, Elliott G.  
29 Endocytic tubules regulated by Rab GTPases 5 and 11 are used for envelopment of  
30 herpes simplex virus. *The EMBO Journal* 2012;31:4204–20.  
31 <https://doi.org/10.1038/emboj.2012.262>.
- 32 [44] Collier KE, Heaton NS, Berger KL, Cooper JD, Saunders JL, Randall G.  
33 Molecular Determinants and Dynamics of Hepatitis C Virus Secretion. *Plos Pathog*  
34 2012;8:e1002466. <https://doi.org/10.1371/journal.ppat.1002466>.

35  
36

## 1 **Abbreviations**

- 2 aa: amino acid
- 3 ARM: Arginine-Rich Motif
- 4 EEA1: Early Endosome Antigen-1
- 5 EHD: Eps15 homology domain
- 6 eHEV: enveloped HEV
- 7 EM: Electron Microscopy
- 8 ER: Endoplasmic Reticulum
- 9 ERC: Endocytic-Recycling Compartment
- 10 ERGIC: Endoplasmic Reticulum-Golgi Intermediate Compartment
- 11 ESCRT: Endosomal Sorting Complexes Required for Transport
- 12 GA: Golgi apparatus
- 13 gt: genotype
- 14 HD: Heat-denatured
- 15 HEV: Hepatitis E Virus
- 16 IAV: Influenza A virus
- 17 IF: Immunofluorescence
- 18 IG: Immunogold
- 19 IP: Immunoprecipitation
- 20 MICAL-L1: Molecule Interacting with CasL-like1
- 21 MOC: Mander's Overlap Coefficient
- 22 MTOC: Microtubule-Organizing Center
- 23 MVB: Multivesicular Bodies
- 24 ORF: Open Reading Frame
- 25 ORF2c: cleaved ORF2

- 1 ORF2g: glycosylated ORF2
- 2 ORF2i: infectious ORF2
- 3 PACSIN2: Protein Kinase C and Casein Kinase Substrate in Neurons 2
- 4 p.e. :post-electroporation
- 5 PMP70: 70-kDa Peroxisomal Membrane Protein
- 6 qIP: immunoprecipitation followed by RT-qPCR
- 7 siRNA: small interfering RNA
- 8 SN: Supernatant
- 9 TRE: Tubular-Recycling Endosome
- 10 TrF: Transferrin
- 11 TX: Triton X-100
- 12 WB: Western Blotting
- 13

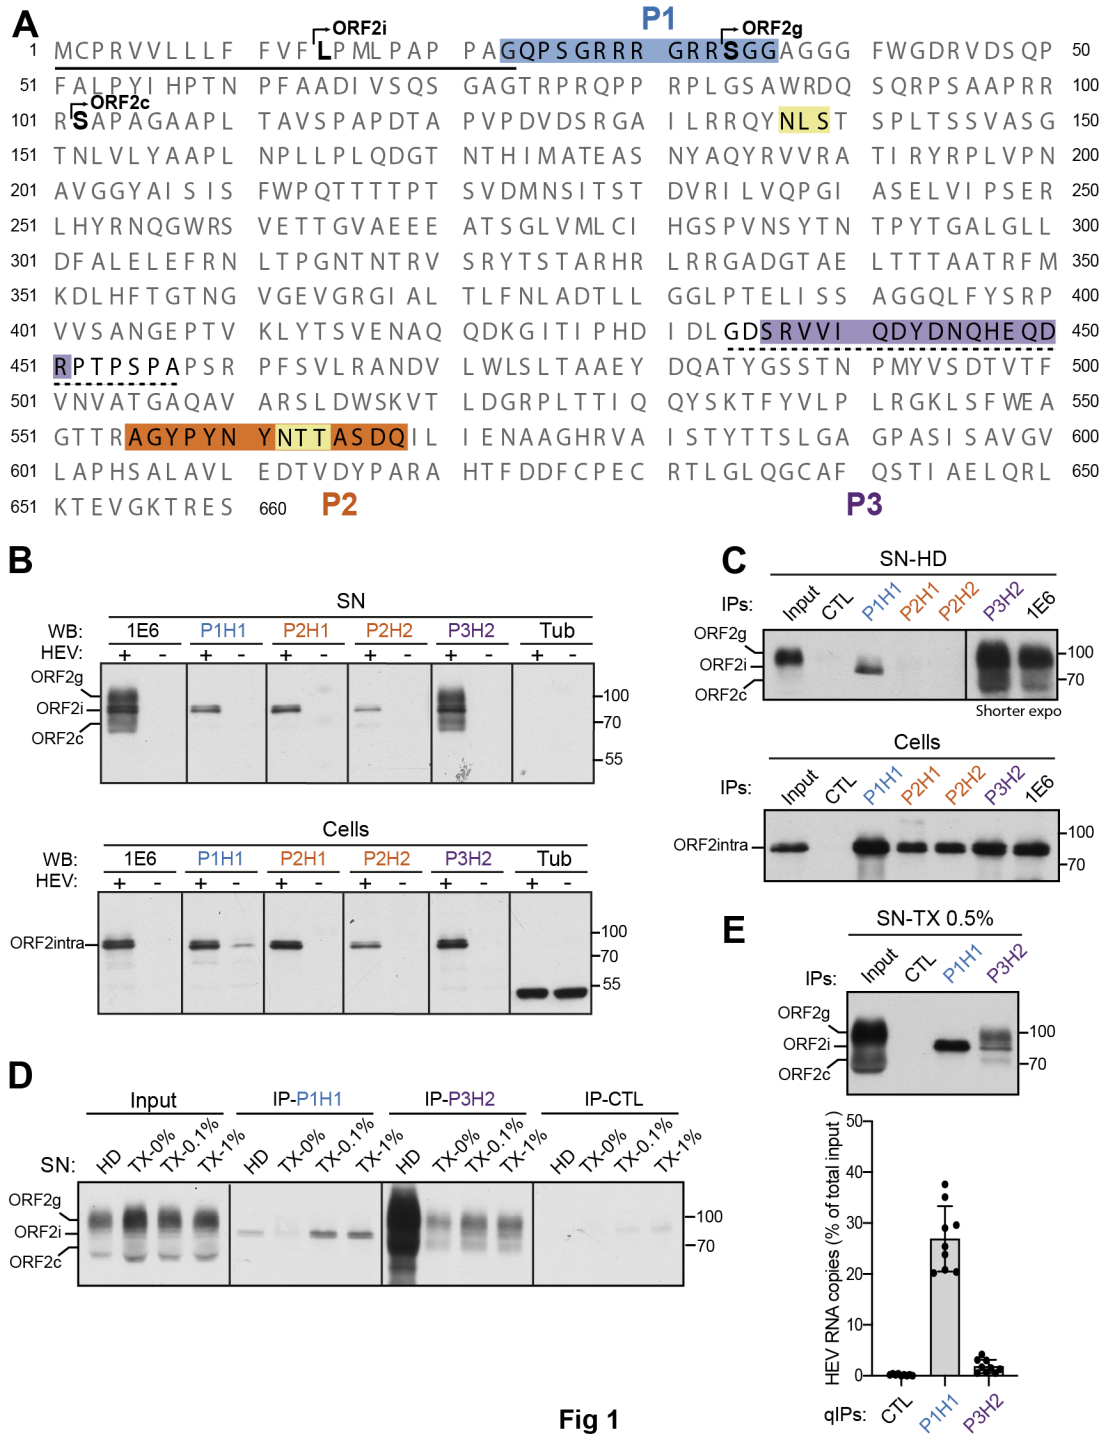

Fig 1

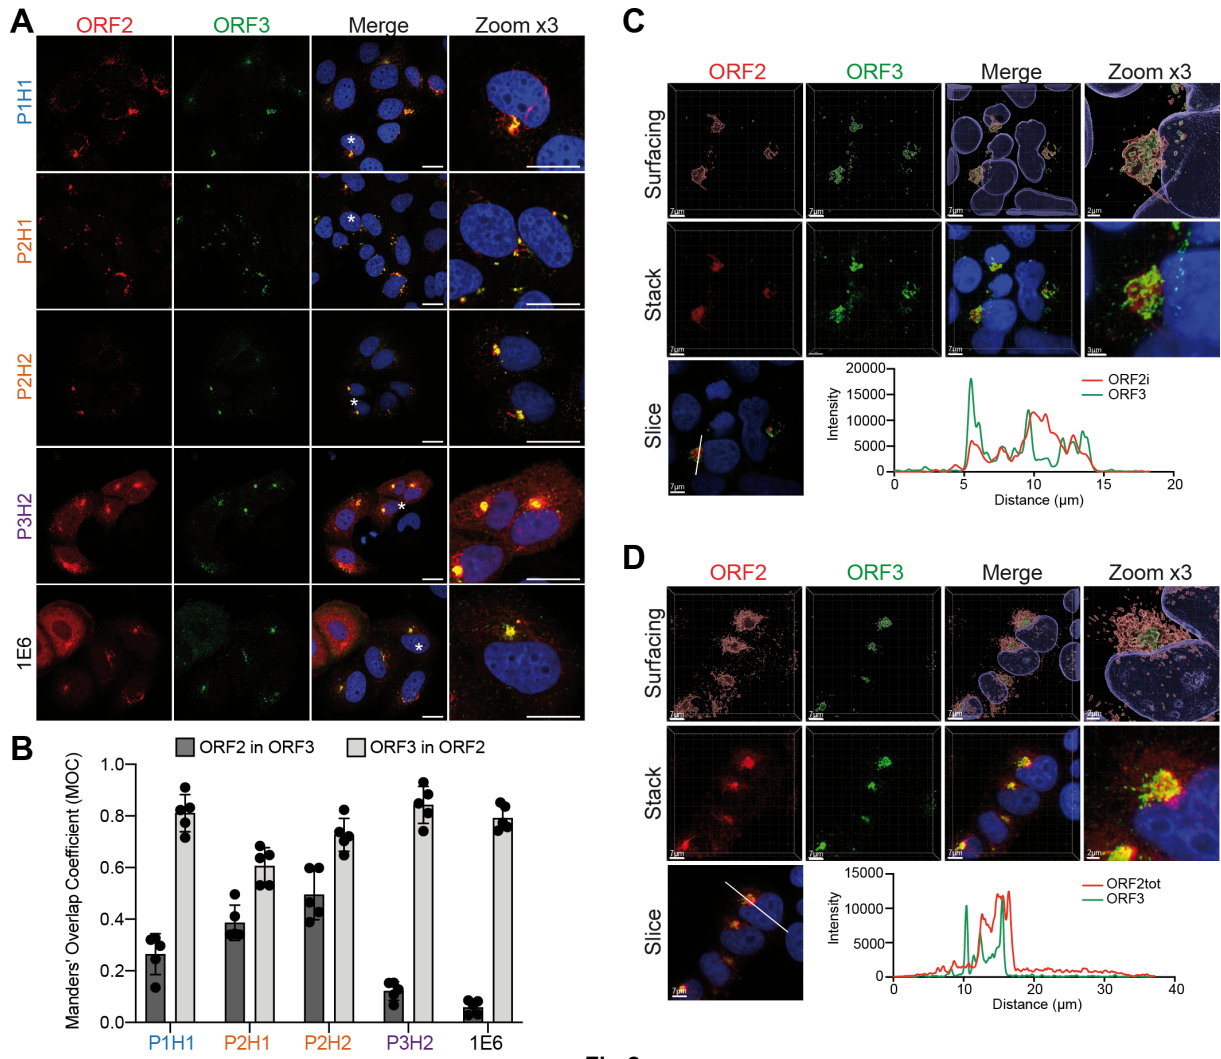

Fig 2

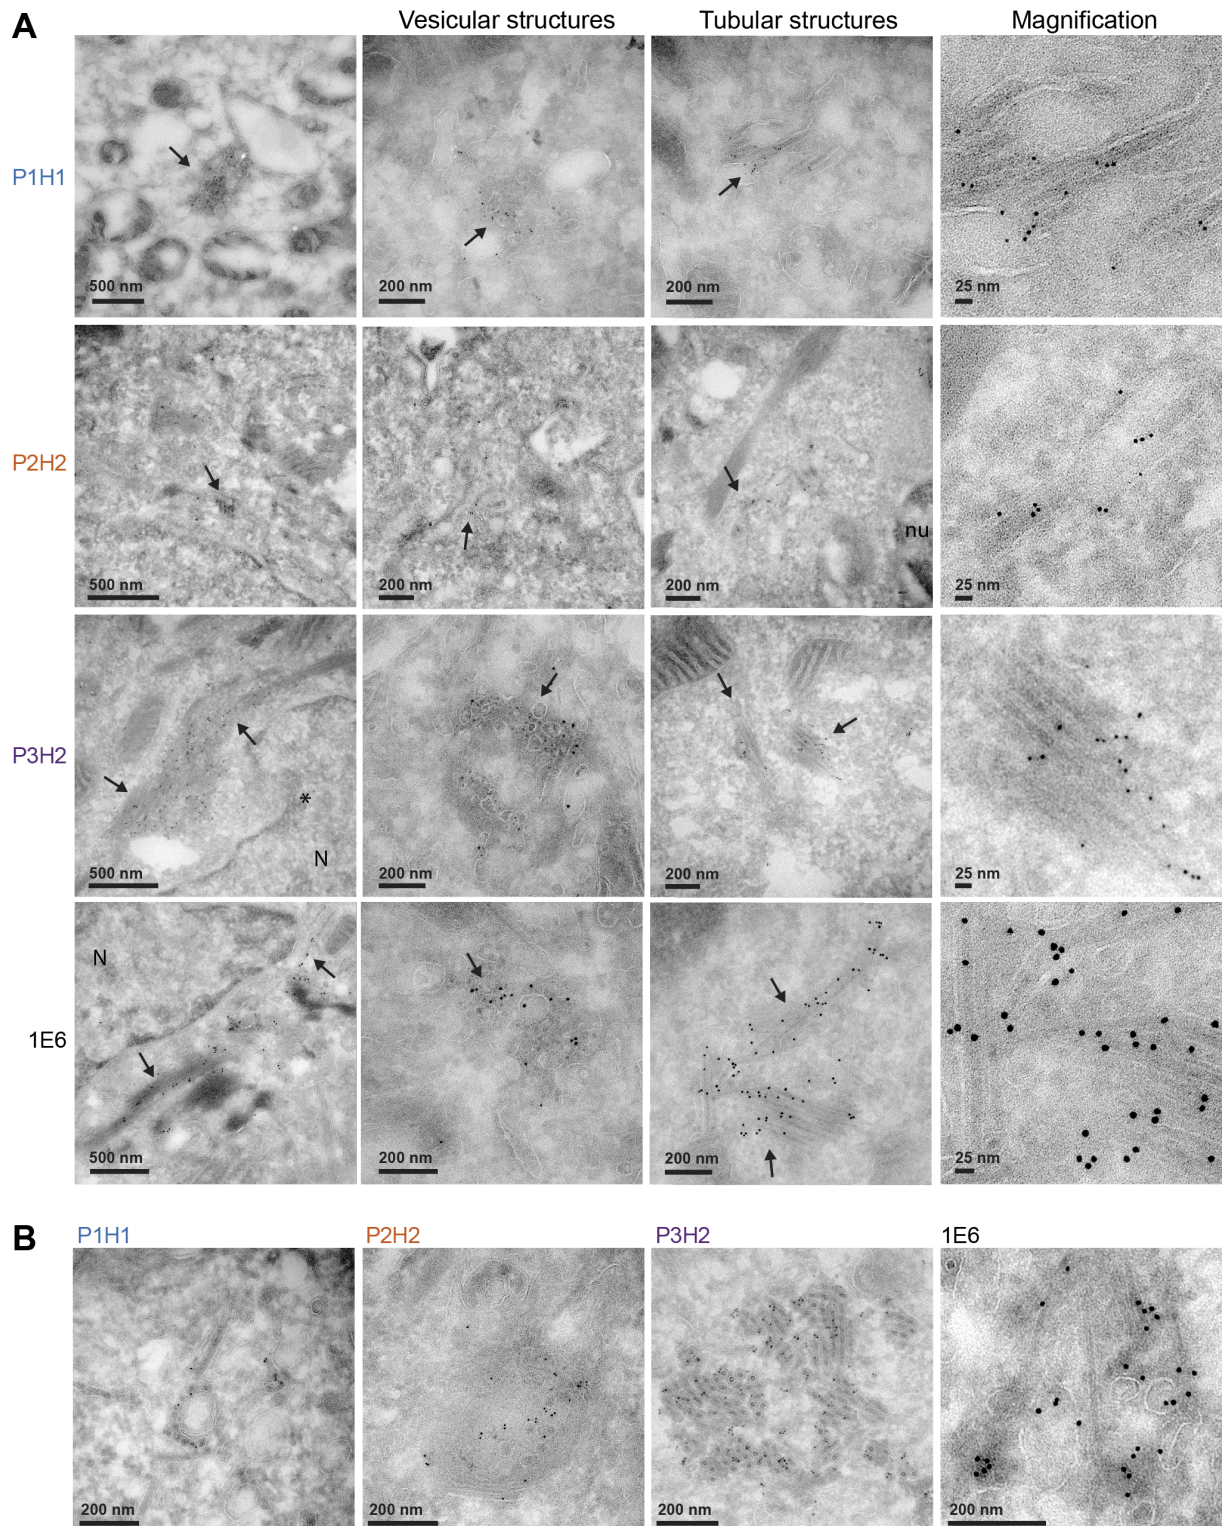

**Fig 3**

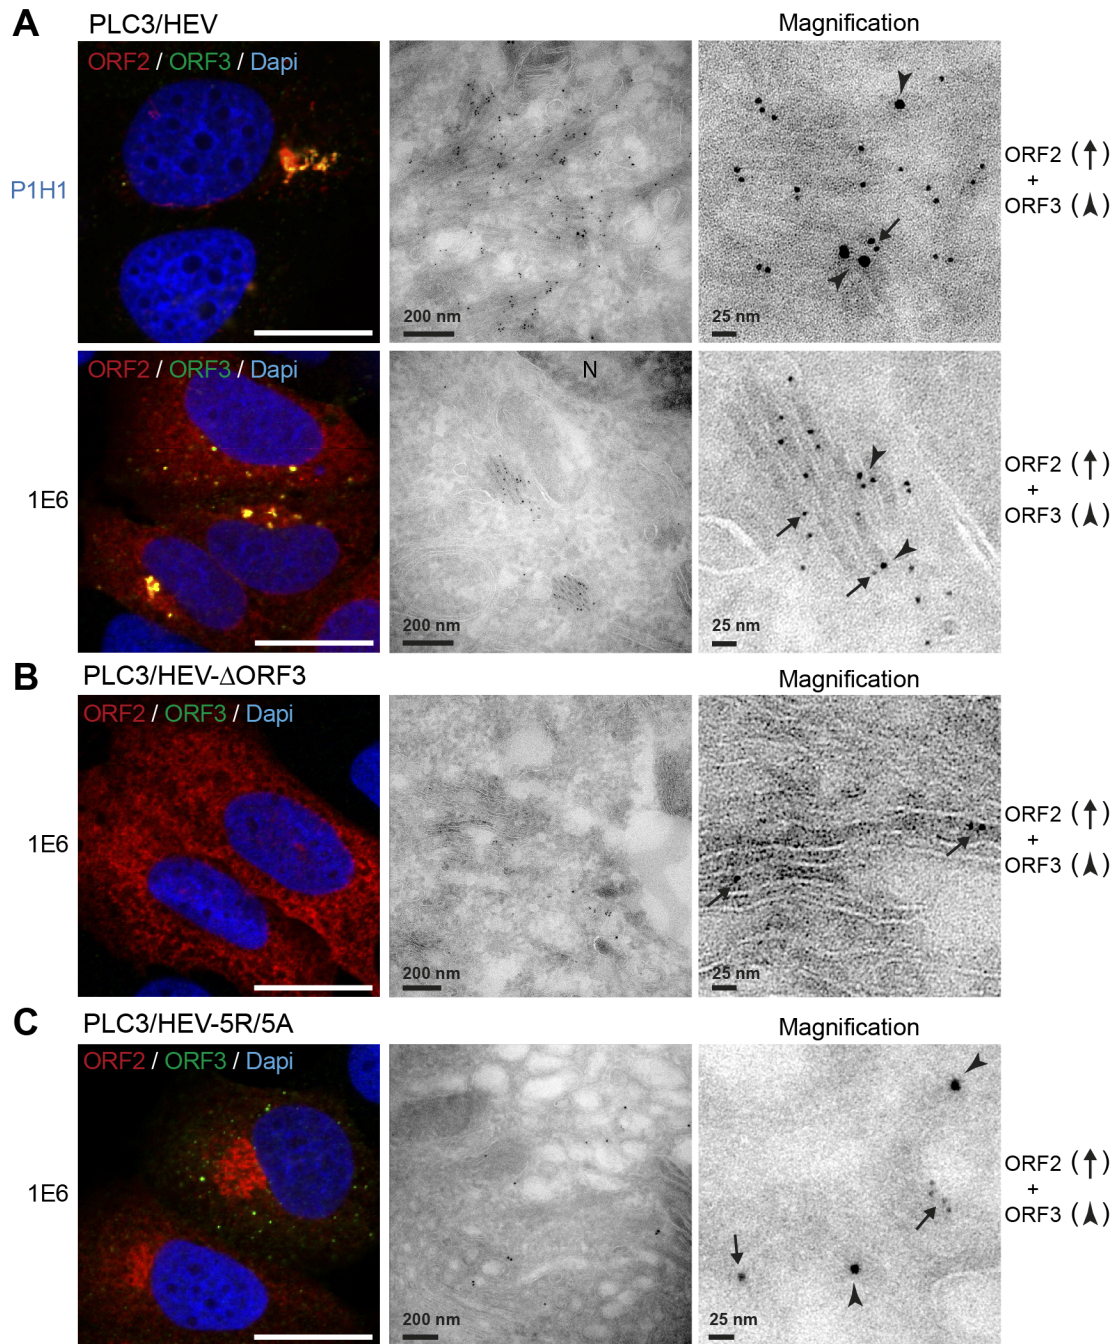

**Fig 4**



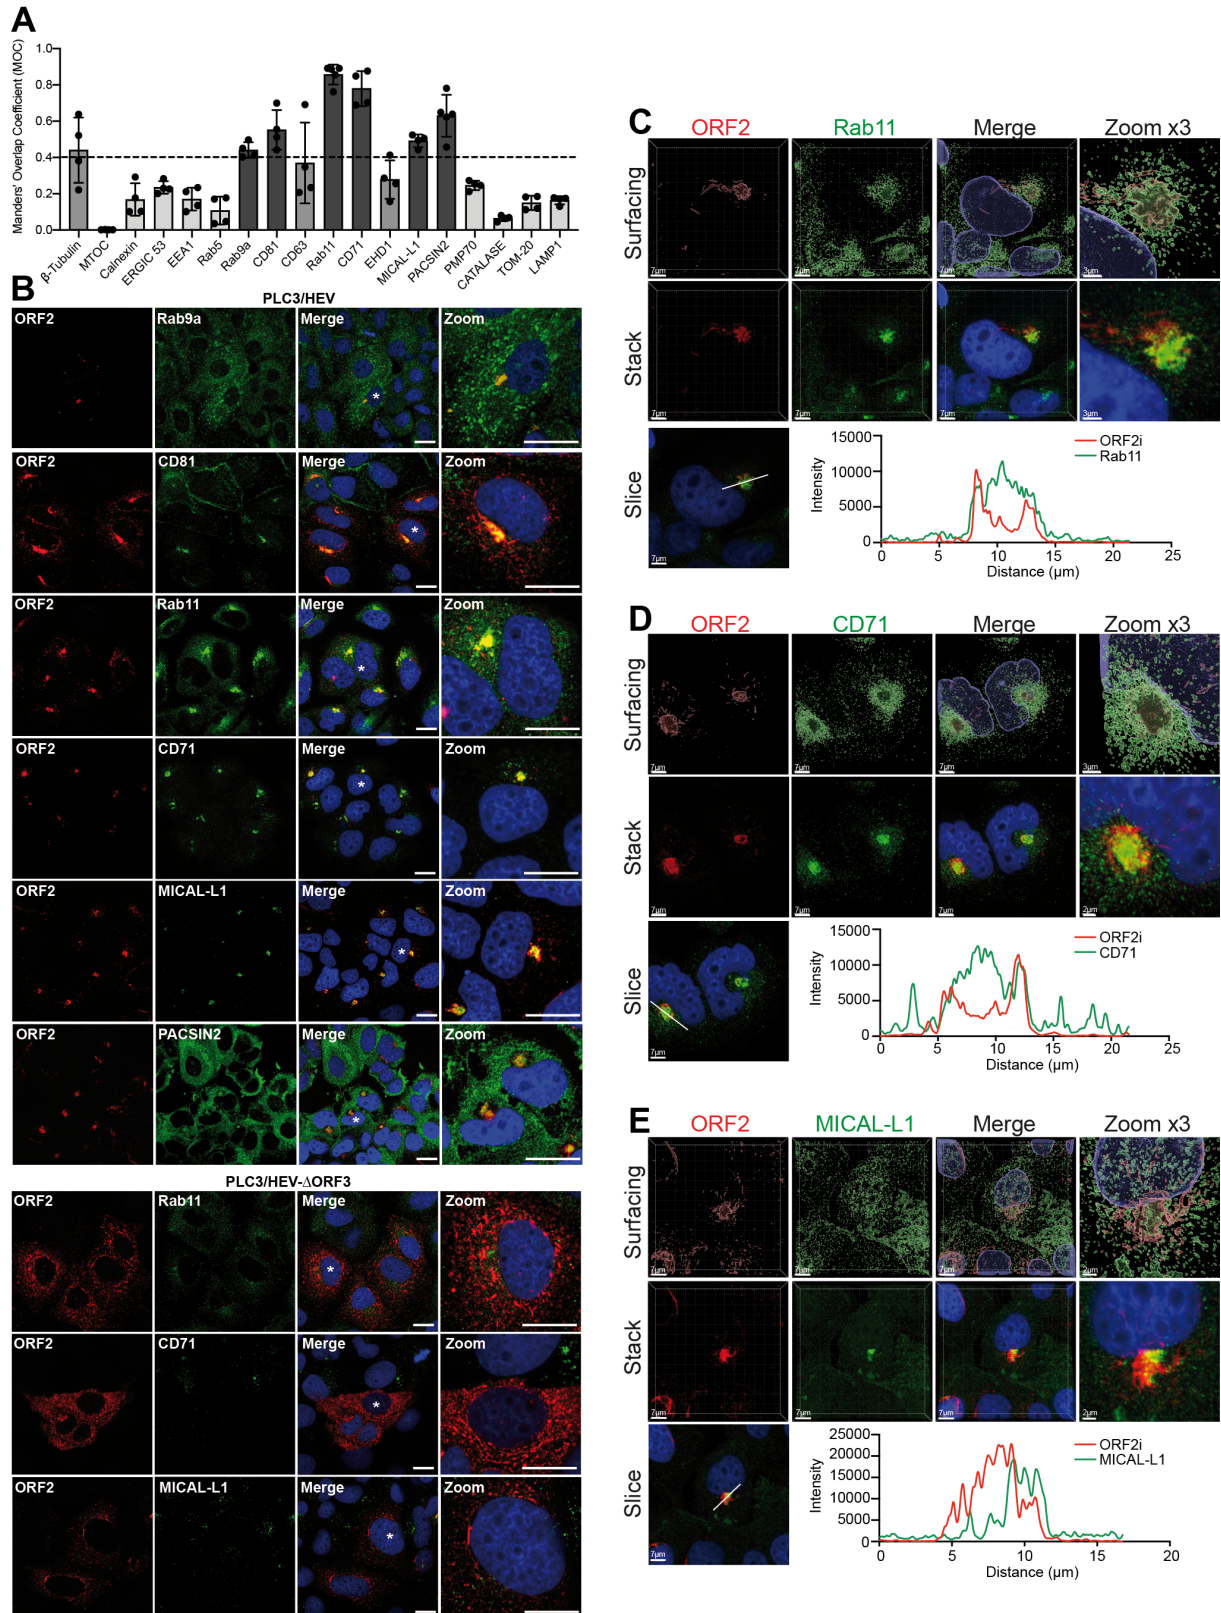

Fig 5

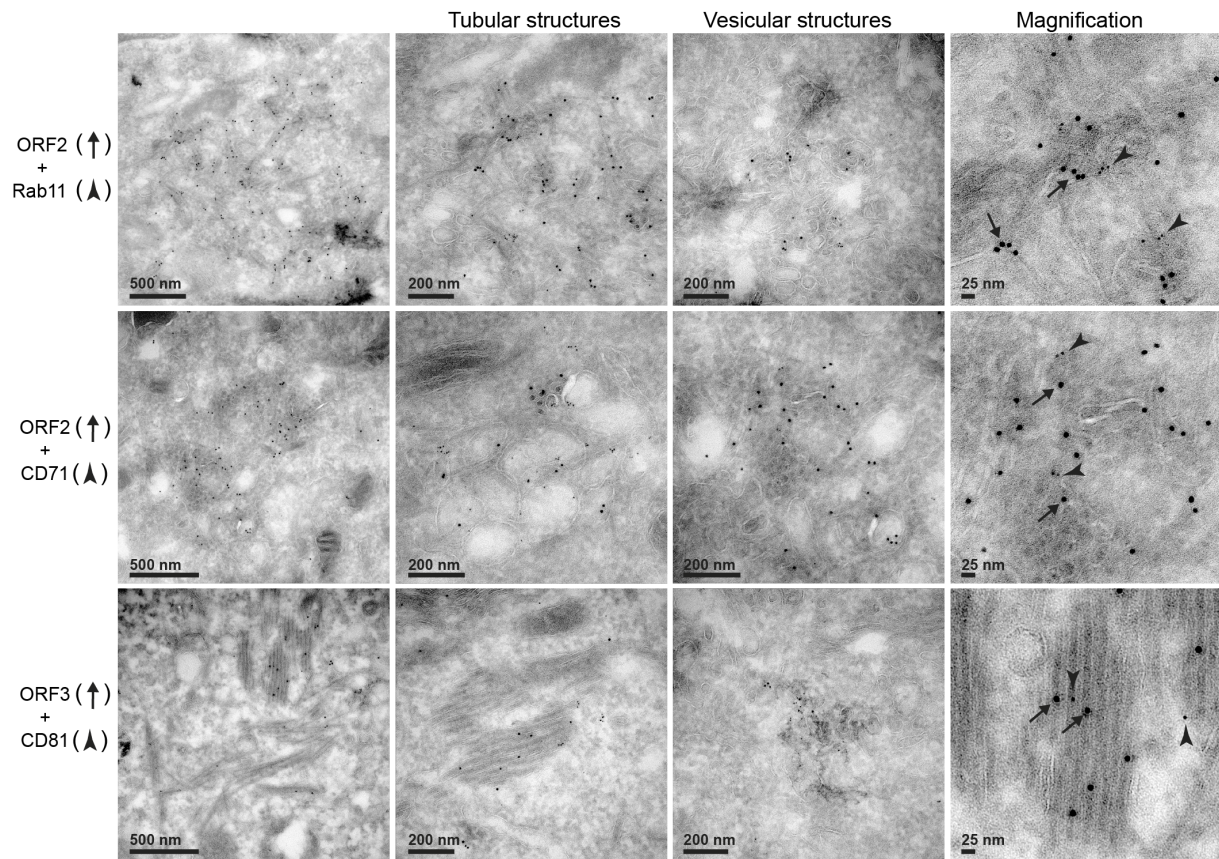

Fig 6

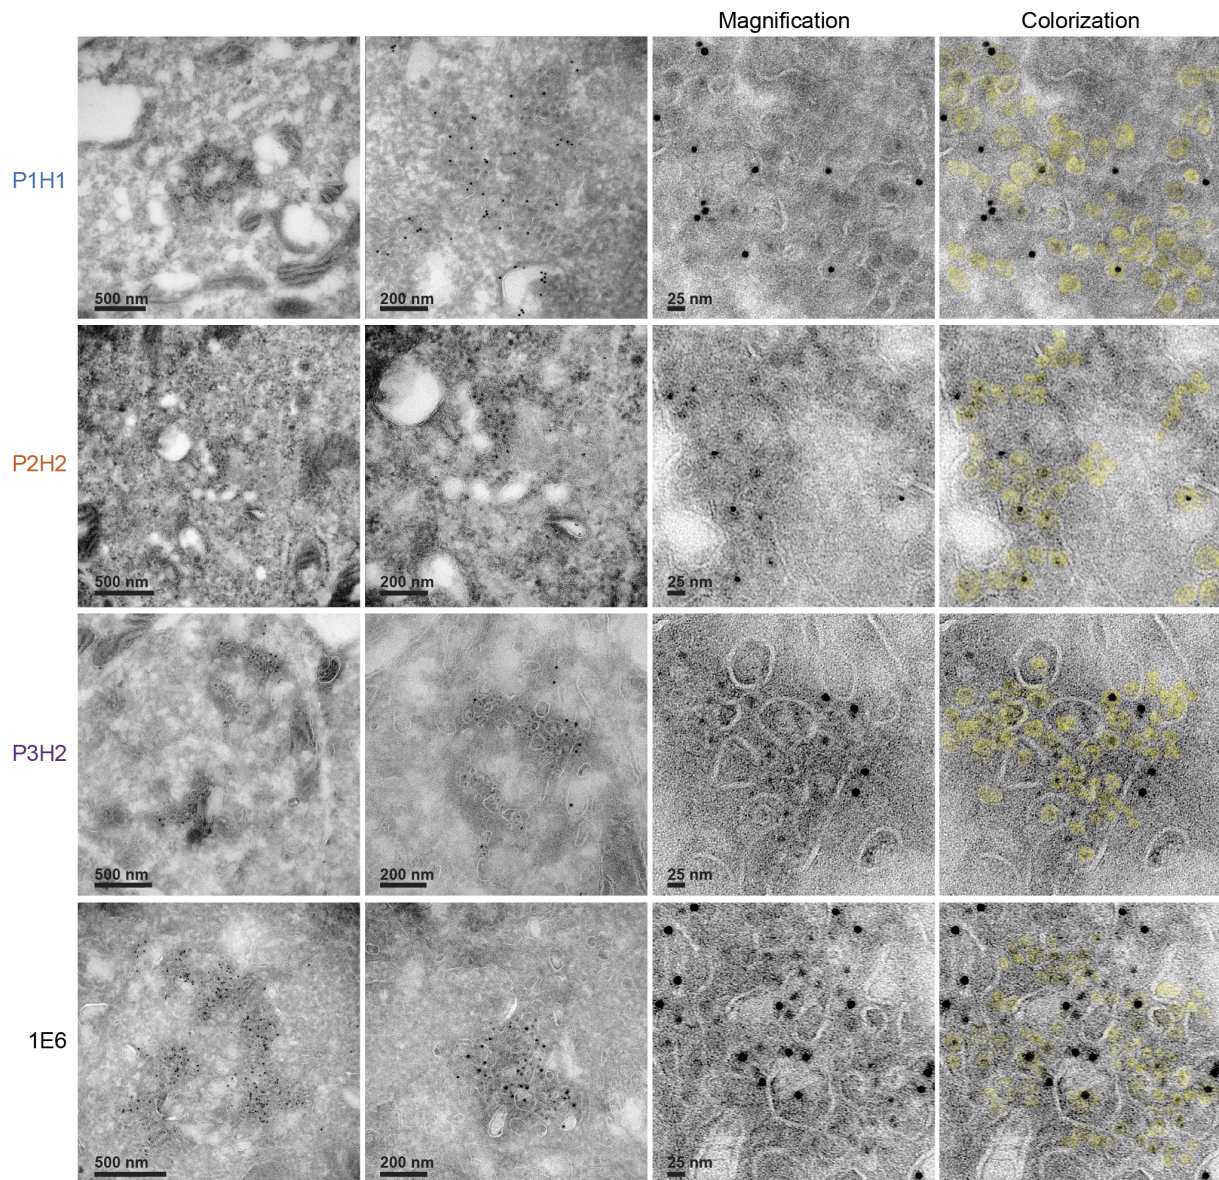

Fig 7

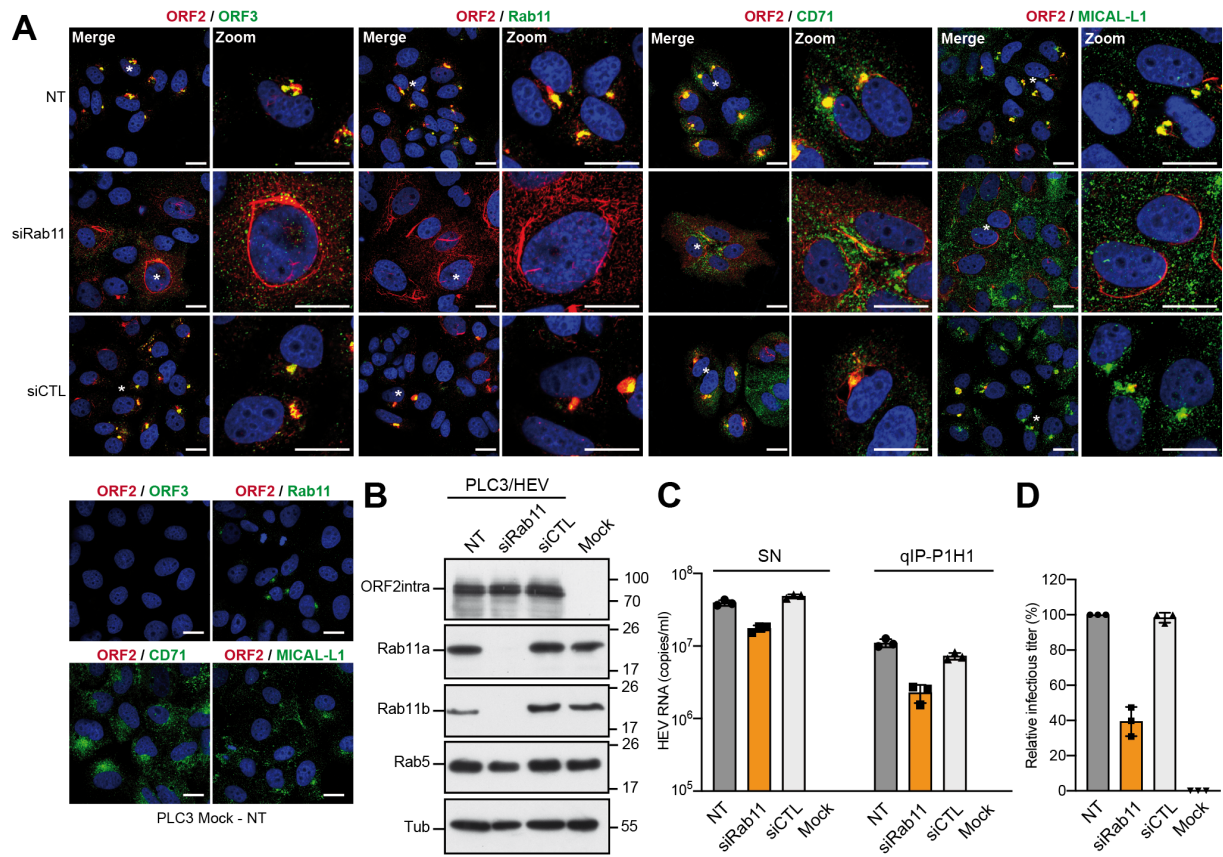

Source: http://biorxiv.org/content/10.1101/2021.10.14.464345v1.full.pdf
